# Supplementary material for: Effect of Ultrasound-Assisted Extraction of Carotenoids from Papaya (Carica papaya L. cv. Sweet Mary) Using Vegetable Oils
Source: MDPI journal article supplement (doi:10.3390/molecules27030638), 2022-01-19
Supplement: s1 [file s1]

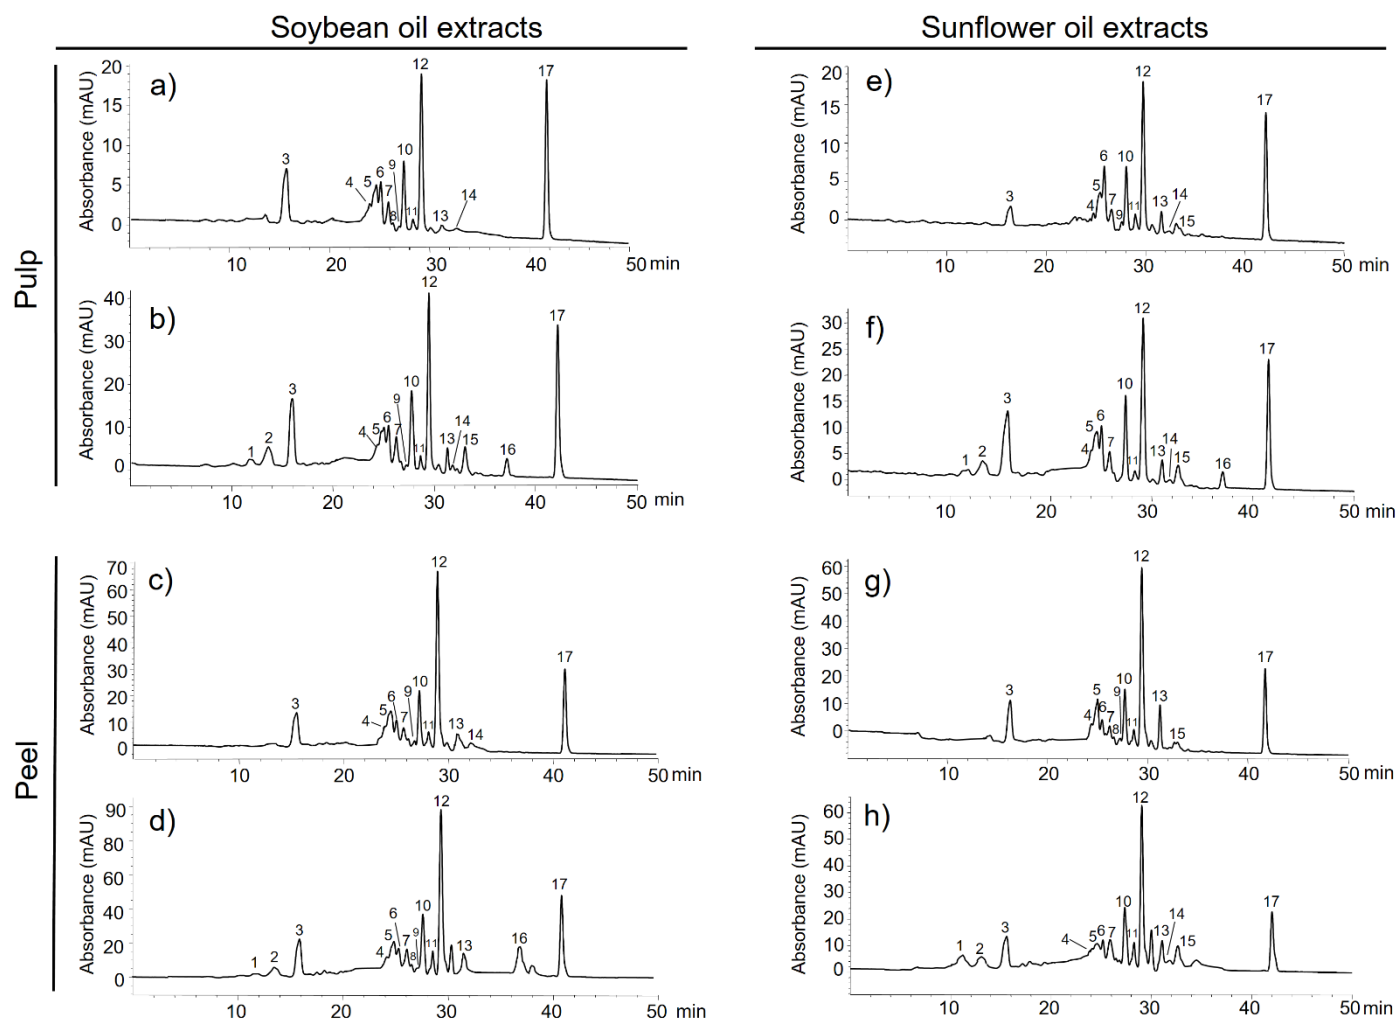

**Supplementary Figure S1.** C<sub>30</sub> reversed-phase chromatograms of carotenoids and carotenoid esters identified from papaya (*Carica papaya* L. cv. Sweet Mary) in soybean oil pulp a) control and b) run 9 (60%/ 10 min/ 20% EtOH) extracts and in peel c) control and d) run 14 (60%/ 60 min/ 5% EtOH) extracts; also, in sunflower oil pulp e) control and f) run 9 extracts and in peel g) control and h) run 14 extracts. Peak identities in Table 1.

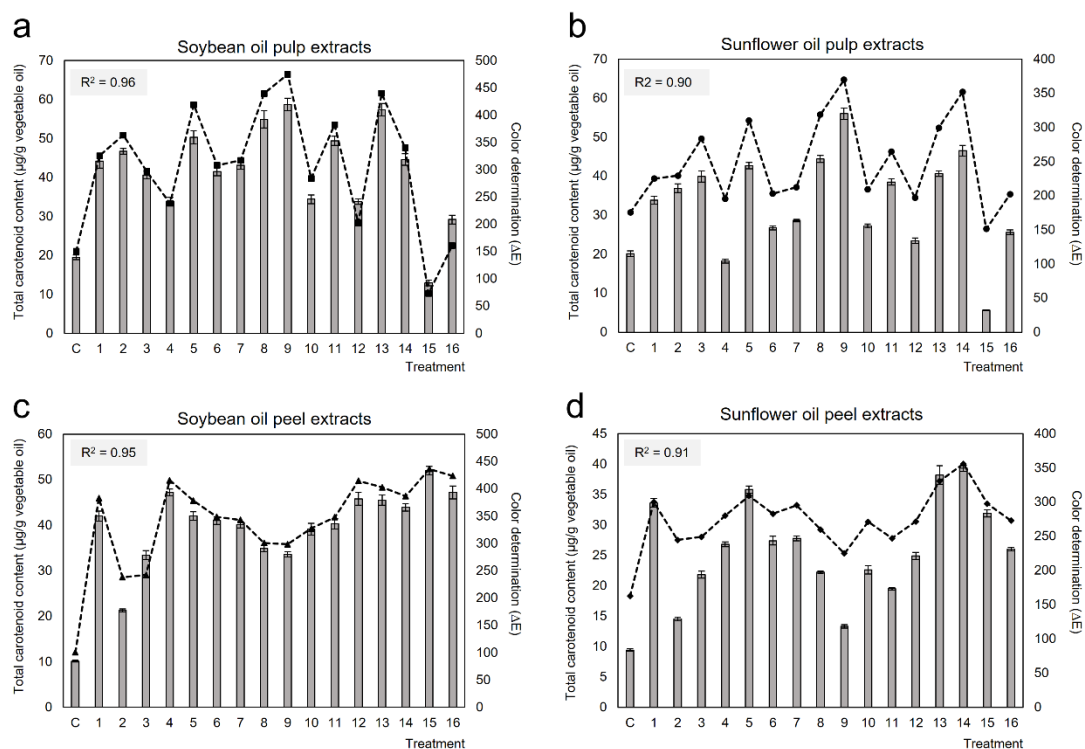

**Supplementary Figure S2.** Correlation analysis using the regression coefficient ( $r^2$ ) between total carotenoids content ( $\mu\text{g}$  carotenoids/g vegetable oil) and color determination ( $\Delta E$ ) in a) soybean oil and b) sunflower oil pulp extracts and c) soybean oil and d) sunflower oil peel extracts. Letter "C" refers to control and treated samples correspond to the combinations of the variables in the CCD listed in Table 2.

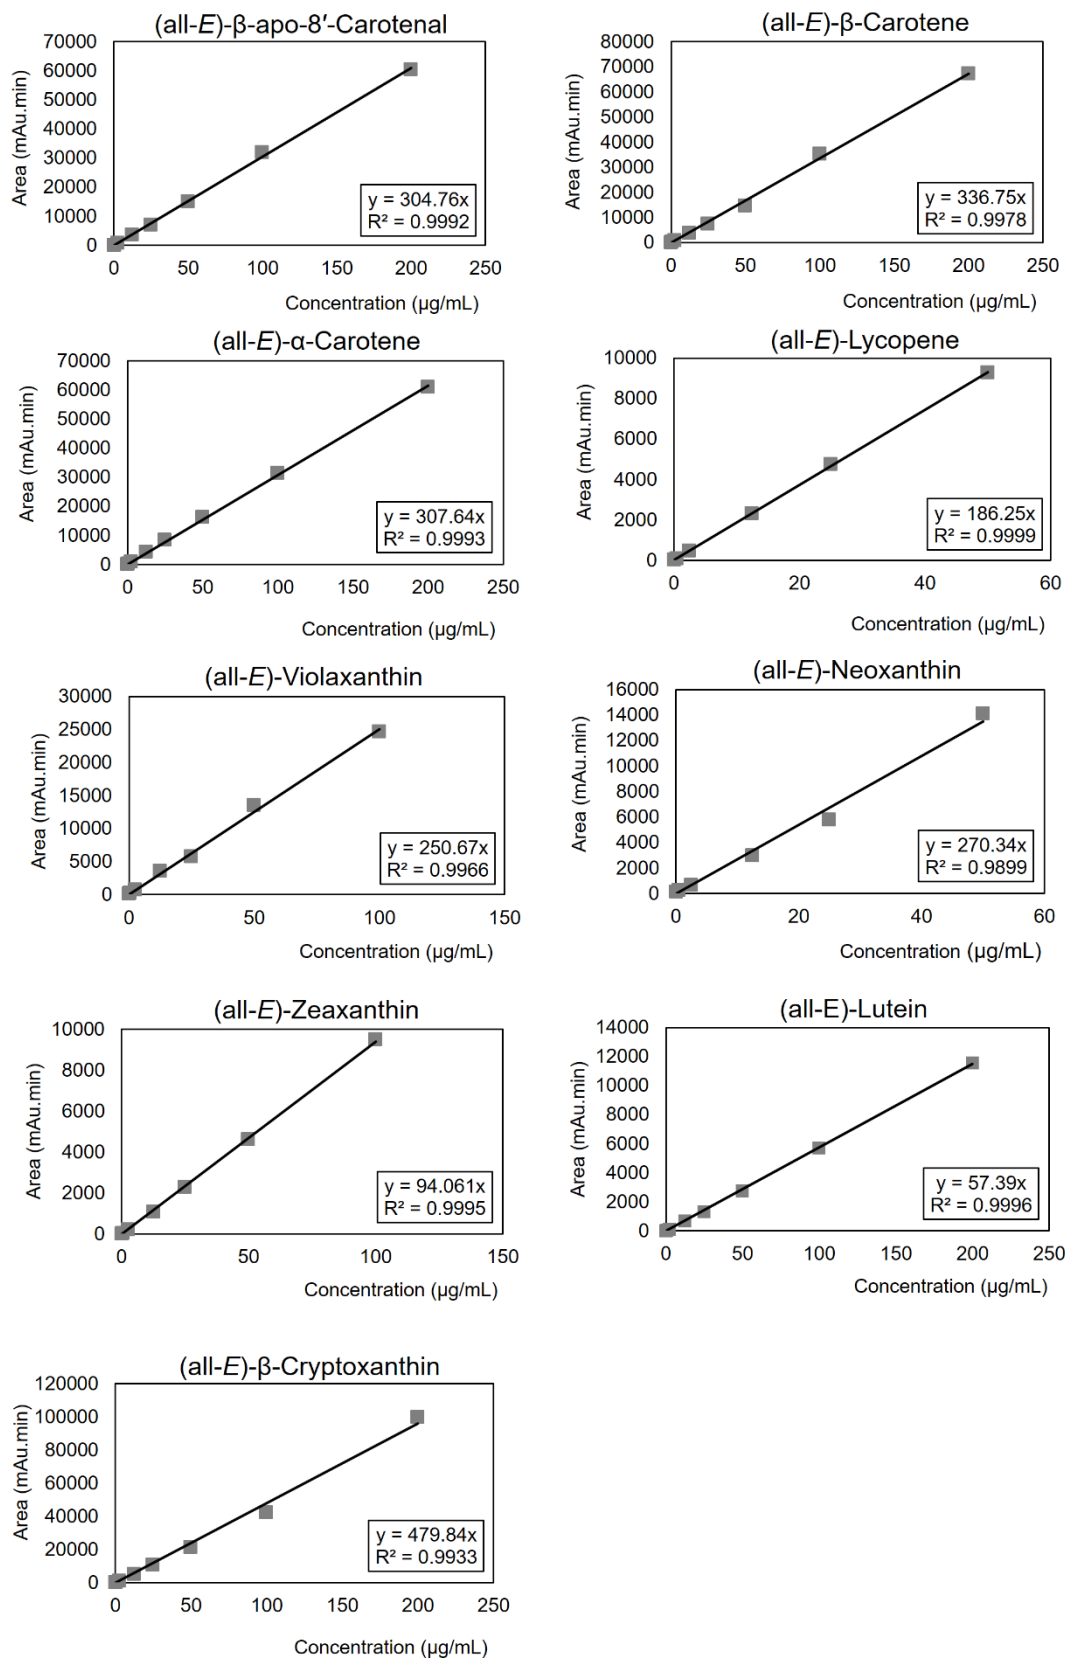

**Supplementary Figure S3.** Calibration curves of carotenoids standards.

**Table S1.** Carotenoid extraction yields<sup>1</sup> obtained from papaya (*Carica papaya* L. cv. Sweet Mary) pulp tissue applying UAE using soybean oil and ethanol as green extraction solvent.

| Compound                                            | Extraction yield in pulp soybean oil extracts (%) |                           |                          |                            |                          |                            |                           |                           |                           |                           |                           |                            |                          |                           |                           |                         |                           |
|-----------------------------------------------------|---------------------------------------------------|---------------------------|--------------------------|----------------------------|--------------------------|----------------------------|---------------------------|---------------------------|---------------------------|---------------------------|---------------------------|----------------------------|--------------------------|---------------------------|---------------------------|-------------------------|---------------------------|
|                                                     | C                                                 | 1                         | 2                        | 3                          | 4                        | 5                          | 6                         | 7                         | 8                         | 9                         | 10                        | 11                         | 12                       | 13                        | 14                        | 15                      | 16                        |
| (9Z)- $\alpha$ -cryptoxanthin                       | 0 $\pm$ 0 <sup>a</sup>                            | 51 $\pm$ 1 <sup>i</sup>   | 45 $\pm$ 2 <sup>h</sup>  | 34 $\pm$ 2 <sup>fg</sup>   | 24 $\pm$ 0 <sup>c</sup>  | 34 $\pm$ 1 <sup>fg</sup>   | 37 $\pm$ 2 <sup>g</sup>   | 30 $\pm$ 2 <sup>ef</sup>  | 35 $\pm$ 1 <sup>g</sup>   | 34 $\pm$ 1 <sup>fg</sup>  | 30 $\pm$ 0 <sup>ef</sup>  | 27 $\pm$ 0 <sup>cde</sup>  | 25 $\pm$ 1 <sup>cd</sup> | 43 $\pm$ 1 <sup>h</sup>   | 36 $\pm$ 2 <sup>g</sup>   | 9 $\pm$ 0 <sup>b</sup>  | 29 $\pm$ 1 <sup>de</sup>  |
| (all- <i>E</i> )- $\alpha$ -cryptoxanthin           | 0 $\pm$ 0 <sup>a</sup>                            | 15 $\pm$ 1 <sup>def</sup> | 22 $\pm$ 0 <sup>i</sup>  | 15 $\pm$ 1 <sup>def</sup>  | 8 $\pm$ 1 <sup>c</sup>   | 16 $\pm$ 1 <sup>fg</sup>   | 13 $\pm$ 1 <sup>de</sup>  | 15 $\pm$ 0 <sup>def</sup> | 18 $\pm$ 2 <sup>gh</sup>  | 18 $\pm$ 0 <sup>gh</sup>  | 13 $\pm$ 0 <sup>d</sup>   | 19 $\pm$ 0 <sup>h</sup>    | 16 $\pm$ 0 <sup>fg</sup> | 20 $\pm$ 1 <sup>hi</sup>  | 16 $\pm$ 1 <sup>efg</sup> | 4 $\pm$ 0 <sup>b</sup>  | 15 $\pm$ 1 <sup>def</sup> |
| (all- <i>E</i> )- $\beta$ -cryptoxanthin            | 9 $\pm$ 1 <sup>b</sup>                            | 26 $\pm$ 0 <sup>fgh</sup> | 28 $\pm$ 2 <sup>gh</sup> | 32 $\pm$ 1 <sup>i</sup>    | 15 $\pm$ 2 <sup>c</sup>  | 24 $\pm$ 0 <sup>ef</sup>   | 21 $\pm$ 1 <sup>d</sup>   | 21 $\pm$ 0 <sup>d</sup>   | 27 $\pm$ 1 <sup>fgh</sup> | 26 $\pm$ 0 <sup>fgh</sup> | 18 $\pm$ 0 <sup>c</sup>   | 29 $\pm$ 1 <sup>h</sup>    | 17 $\pm$ 1 <sup>c</sup>  | 23 $\pm$ 1 <sup>de</sup>  | 25 $\pm$ 1 <sup>efg</sup> | 6 $\pm$ 0 <sup>a</sup>  | 17 $\pm$ 0 <sup>c</sup>   |
| (9Z)-violaxanthin laurate                           | 15 $\pm$ 0 <sup>ab</sup>                          | 65 $\pm$ 5 <sup>ef</sup>  | 70 $\pm$ 1 <sup>fg</sup> | 83 $\pm$ 2 <sup>hi</sup>   | 36 $\pm$ 1 <sup>d</sup>  | 75 $\pm$ 2 <sup>gh</sup>   | 58 $\pm$ 2 <sup>e</sup>   | 63 $\pm$ 3 <sup>ef</sup>  | 68 $\pm$ 5 <sup>fg</sup>  | 82 $\pm$ 6 <sup>hi</sup>  | 27 $\pm$ 2 <sup>c</sup>   | 90 $\pm$ 4 <sup>i</sup>    | 38 $\pm$ 2 <sup>d</sup>  | 58 $\pm$ 2 <sup>e</sup>   | 80 $\pm$ 0 <sup>h</sup>   | 9 $\pm$ 0 <sup>a</sup>  | 21 $\pm$ 1 <sup>bc</sup>  |
| (all- <i>E</i> )-lutein-3-O-myristate               | 26 $\pm$ 0 <sup>d</sup>                           | 36 $\pm$ 0 <sup>ef</sup>  | 45 $\pm$ 1 <sup>h</sup>  | 42 $\pm$ 1 <sup>g</sup>    | 13 $\pm$ 1 <sup>b</sup>  | 26 $\pm$ 0 <sup>d</sup>    | 26 $\pm$ 1 <sup>d</sup>   | 25 $\pm$ 0 <sup>d</sup>   | 37 $\pm$ 0 <sup>f</sup>   | 33 $\pm$ 0 <sup>e</sup>   | 13 $\pm$ 0 <sup>b</sup>   | 37 $\pm$ 1 <sup>f</sup>    | 20 $\pm$ 0 <sup>c</sup>  | 24 $\pm$ 1 <sup>d</sup>   | 34 $\pm$ 0 <sup>e</sup>   | 8 $\pm$ 1 <sup>a</sup>  | 15 $\pm$ 0 <sup>b</sup>   |
| (all- <i>E</i> )- $\beta$ -carotene                 | 8 $\pm$ 0 <sup>b</sup>                            | 10 $\pm$ 0 <sup>cd</sup>  | 15 $\pm$ 0 <sup>i</sup>  | 14 $\pm$ 1 <sup>hi</sup>   | 8 $\pm$ 0 <sup>b</sup>   | 12 $\pm$ 0 <sup>def</sup>  | 10 $\pm$ 0 <sup>cd</sup>  | 10 $\pm$ 0 <sup>c</sup>   | 12 $\pm$ 1 <sup>efg</sup> | 13 $\pm$ 0 <sup>fgh</sup> | 6 $\pm$ 0 <sup>b</sup>    | 14 $\pm$ 0 <sup>gh</sup>   | 7 $\pm$ 0 <sup>b</sup>   | 11 $\pm$ 0 <sup>cde</sup> | 10 $\pm$ 1 <sup>cd</sup>  | 3 $\pm$ 0 <sup>a</sup>  | 6 $\pm$ 0 <sup>b</sup>    |
| (all- <i>E</i> )-antheraxanthin myristate palmitate | 18 $\pm$ 1 <sup>b</sup>                           | 24 $\pm$ 0 <sup>de</sup>  | 49 $\pm$ 2 <sup>l</sup>  | 33 $\pm$ 0 <sup>hi</sup>   | 22 $\pm$ 1 <sup>cd</sup> | 21 $\pm$ 1 <sup>c</sup>    | 33 $\pm$ 1 <sup>hi</sup>  | 28 $\pm$ 1 <sup>fg</sup>  | 31 $\pm$ 1 <sup>gh</sup>  | 38 $\pm$ 1 <sup>k</sup>   | 26 $\pm$ 0 <sup>ef</sup>  | 37 $\pm$ 1 <sup>jk</sup>   | 21 $\pm$ 0 <sup>c</sup>  | 35 $\pm$ 0 <sup>ij</sup>  | 25 $\pm$ 1 <sup>e</sup>   | 13 $\pm$ 1 <sup>a</sup> | 26 $\pm$ 1 <sup>ef</sup>  |
| (all- <i>E</i> )-violaxanthin palmitate             | 9 $\pm$ 2 <sup>bc</sup>                           | 4 $\pm$ 0 <sup>a</sup>    | 11 $\pm$ 1 <sup>bc</sup> | 11 $\pm$ 0 <sup>bc</sup>   | 6 $\pm$ 1 <sup>a</sup>   | 12 $\pm$ 0 <sup>bc</sup>   | 9 $\pm$ 0 <sup>bc</sup>   | 9 $\pm$ 0 <sup>bc</sup>   | 10 $\pm$ 0 <sup>bc</sup>  | 13 $\pm$ 1 <sup>c</sup>   | 5 $\pm$ 0 <sup>a</sup>    | 10 $\pm$ 1 <sup>bc</sup>   | 4 $\pm$ 0 <sup>a</sup>   | 10 $\pm$ 0 <sup>bc</sup>  | 9 $\pm$ 0 <sup>b</sup>    | 4 $\pm$ 0 <sup>a</sup>  | 5 $\pm$ 0 <sup>a</sup>    |
| (9Z)-neoxanthin dibutyrate                          | 13 $\pm$ 1 <sup>cde</sup>                         | 9 $\pm$ 1 <sup>bcd</sup>  | 0 $\pm$ 0 <sup>a</sup>   | 10 $\pm$ 0 <sup>bcd</sup>  | 7 $\pm$ 1 <sup>bc</sup>  | 24 $\pm$ 1 <sup>f</sup>    | 11 $\pm$ 1 <sup>bcd</sup> | 12 $\pm$ 1 <sup>cde</sup> | 13 $\pm$ 0 <sup>de</sup>  | 17 $\pm$ 0 <sup>e</sup>   | 9 $\pm$ 0 <sup>bcd</sup>  | 14 $\pm$ 1 <sup>de</sup>   | 6 $\pm$ 0 <sup>b</sup>   | 14 $\pm$ 1 <sup>de</sup>  | 14 $\pm$ 0 <sup>de</sup>  | 0 $\pm$ 0 <sup>a</sup>  | 0 $\pm$ 0 <sup>a</sup>    |
| (all- <i>E</i> )- $\beta$ -cryptoxanthin caprate    | 18 $\pm$ 1 <sup>b</sup>                           | 32 $\pm$ 0 <sup>fgh</sup> | 41 $\pm$ 3 <sup>i</sup>  | 29 $\pm$ 1 <sup>defg</sup> | 20 $\pm$ 1 <sup>b</sup>  | 28 $\pm$ 2 <sup>defg</sup> | 28 $\pm$ 1 <sup>def</sup> | 26 $\pm$ 0 <sup>cde</sup> | 30 $\pm$ 2 <sup>efg</sup> | 36 $\pm$ 1 <sup>h</sup>   | 25 $\pm$ 1 <sup>cd</sup>  | 33 $\pm$ 0 <sup>gh</sup>   | 23 $\pm$ 0 <sup>bc</sup> | 25 $\pm$ 1 <sup>cd</sup>  | 30 $\pm$ 1 <sup>efg</sup> | 8 $\pm$ 0 <sup>a</sup>  | 22 $\pm$ 0 <sup>bc</sup>  |
| (all- <i>E</i> )-lutein dimyristate                 | 18 $\pm$ 0 <sup>a</sup>                           | 40 $\pm$ 1 <sup>f</sup>   | 71 $\pm$ 1 <sup>i</sup>  | 27 $\pm$ 0 <sup>bc</sup>   | 55 $\pm$ 3 <sup>h</sup>  | 31 $\pm$ 2 <sup>cde</sup>  | 35 $\pm$ 2 <sup>e</sup>   | 31 $\pm$ 1 <sup>cde</sup> | 30 $\pm$ 2 <sup>cde</sup> | 29 $\pm$ 2 <sup>cd</sup>  | 50 $\pm$ 1 <sup>g</sup>   | 31 $\pm$ 1 <sup>cde</sup>  | 23 $\pm$ 1 <sup>b</sup>  | 23 $\pm$ 1 <sup>b</sup>   | 33 $\pm$ 1 <sup>de</sup>  | 18 $\pm$ 1 <sup>a</sup> | 48 $\pm$ 0 <sup>g</sup>   |
| (all- <i>E</i> )- $\beta$ -cryptoxanthin laurate    | 29 $\pm$ 1 <sup>b</sup>                           | 52 $\pm$ 2 <sup>hi</sup>  | 61 $\pm$ 1 <sup>k</sup>  | 57 $\pm$ 2 <sup>jk</sup>   | 34 $\pm$ 1 <sup>c</sup>  | 53 $\pm$ 2 <sup>hi</sup>   | 48 $\pm$ 0 <sup>fg</sup>  | 44 $\pm$ 0 <sup>f</sup>   | 53 $\pm$ 1 <sup>hij</sup> | 52 $\pm$ 2 <sup>ghi</sup> | 38 $\pm$ 0 <sup>de</sup>  | 60 $\pm$ 2 <sup>k</sup>    | 34 $\pm$ 0 <sup>cd</sup> | 49 $\pm$ 2 <sup>gh</sup>  | 56 $\pm$ 1 <sup>ij</sup>  | 13 $\pm$ 1 <sup>a</sup> | 40 $\pm$ 1 <sup>e</sup>   |
| (all- <i>E</i> )-antheraxanthin laurate myristate   | 18 $\pm$ 0 <sup>c</sup>                           | 25 $\pm$ 2 <sup>d</sup>   | 0 $\pm$ 0 <sup>a</sup>   | 23 $\pm$ 1 <sup>cd</sup>   | 9 $\pm$ 0 <sup>b</sup>   | 22 $\pm$ 2 <sup>cd</sup>   | 65 $\pm$ 2 <sup>h</sup>   | 53 $\pm$ 1 <sup>g</sup>   | 29 $\pm$ 2 <sup>de</sup>  | 34 $\pm$ 1 <sup>e</sup>   | 67 $\pm$ 1 <sup>h</sup>   | 28 $\pm$ 0 <sup>d</sup>    | 46 $\pm$ 3 <sup>f</sup>  | 25 $\pm$ 1 <sup>d</sup>   | 27 $\pm$ 2 <sup>d</sup>   | 63 $\pm$ 4 <sup>h</sup> | 89 $\pm$ 3 <sup>i</sup>   |
| (all- <i>E</i> )- $\beta$ -cryptoxanthin myristate  | 11 $\pm$ 1 <sup>b</sup>                           | 30 $\pm$ 1 <sup>h</sup>   | 82 $\pm$ 1 <sup>j</sup>  | 27 $\pm$ 1 <sup>gh</sup>   | 45 $\pm$ 2 <sup>i</sup>  | 23 $\pm$ 0 <sup>efg</sup>  | 25 $\pm$ 1 <sup>gh</sup>  | 18 $\pm$ 1 <sup>def</sup> | 24 $\pm$ 2 <sup>fgh</sup> | 24 $\pm$ 1 <sup>fgh</sup> | 18 $\pm$ 0 <sup>cde</sup> | 24 $\pm$ 1 <sup>efgh</sup> | 14 $\pm$ 0 <sup>bc</sup> | 23 $\pm$ 1 <sup>def</sup> | 25 $\pm$ 1 <sup>gh</sup>  | 4 $\pm$ 0 <sup>a</sup>  | 17 $\pm$ 1 <sup>cd</sup>  |
| (13Z)-lycopene isomer 2                             | 0 $\pm$ 0 <sup>a</sup>                            | 35 $\pm$ 2 <sup>d</sup>   | 64 $\pm$ 2 <sup>i</sup>  | 34 $\pm$ 2 <sup>d</sup>    | 27 $\pm$ 1 <sup>c</sup>  | 47 $\pm$ 1 <sup>f</sup>    | 46 $\pm$ 0 <sup>f</sup>   | 53 $\pm$ 2 <sup>gh</sup>  | 70 $\pm$ 1 <sup>j</sup>   | 67 $\pm$ 1 <sup>ij</sup>  | 56 $\pm$ 1 <sup>h</sup>   | 46 $\pm$ 1 <sup>f</sup>    | 40 $\pm$ 1 <sup>e</sup>  | 83 $\pm$ 1 <sup>l</sup>   | 77 $\pm$ 0 <sup>k</sup>   | 8 $\pm$ 0 <sup>b</sup>  | 50 $\pm$ 2 <sup>fg</sup>  |
| (9Z)-lycopene isomer 4                              | 0 $\pm$ 0 <sup>a</sup>                            | 12 $\pm$ 1 <sup>b</sup>   | 44 $\pm$ 1 <sup>g</sup>  | 29 $\pm$ 1 <sup>e</sup>    | 75 $\pm$ 2 <sup>k</sup>  | 24 $\pm$ 0 <sup>d</sup>    | 72 $\pm$ 1 <sup>k</sup>   | 63 $\pm$ 1 <sup>i</sup>   | 67 $\pm$ 2 <sup>j</sup>   | 40 $\pm$ 1 <sup>f</sup>   | 59 $\pm$ 0 <sup>i</sup>   | 23 $\pm$ 2 <sup>cd</sup>   | 49 $\pm$ 2 <sup>h</sup>  | 75 $\pm$ 1 <sup>k</sup>   | 63 $\pm$ 2 <sup>i</sup>   | 14 $\pm$ 1 <sup>b</sup> | 19 $\pm$ 0 <sup>c</sup>   |
| (all- <i>E</i> )-lycopene                           | 37 $\pm$ 1 <sup>b</sup>                           | 79 $\pm$ 1 <sup>g</sup>   | 46 $\pm$ 2 <sup>c</sup>  | 43 $\pm$ 1 <sup>c</sup>    | 54 $\pm$ 1 <sup>d</sup>  | 94 $\pm$ 0 <sup>i</sup>    | 68 $\pm$ 0 <sup>f</sup>   | 76 $\pm$ 2 <sup>g</sup>   | 78 $\pm$ 2 <sup>g</sup>   | 93 $\pm$ 1 <sup>hi</sup>  | 63 $\pm$ 0 <sup>e</sup>   | 76 $\pm$ 2 <sup>g</sup>    | 55 $\pm$ 1 <sup>d</sup>  | 89 $\pm$ 1 <sup>h</sup>   | 68 $\pm$ 1 <sup>f</sup>   | 14 $\pm$ 0 <sup>a</sup> | 34 $\pm$ 0 <sup>b</sup>   |
| Total hydrocarbon carotenoids                       | 25 $\pm$ 1 <sup>b</sup>                           | 46 $\pm$ 1 <sup>f</sup>   | 37 $\pm$ 1 <sup>d</sup>  | 31 $\pm$ 1 <sup>c</sup>    | 38 $\pm$ 0 <sup>d</sup>  | 56 $\pm$ 0 <sup>i</sup>    | 47 $\pm$ 0 <sup>f</sup>   | 50 $\pm$ 1 <sup>g</sup>   | 54 $\pm$ 1 <sup>h</sup>   | 58 $\pm$ 1 <sup>i</sup>   | 42 $\pm$ 0 <sup>e</sup>   | 47 $\pm$ 1 <sup>f</sup>    | 37 $\pm$ 0 <sup>d</sup>  | 60 $\pm$ 1 <sup>j</sup>   | 48 $\pm$ 1 <sup>f</sup>   | 10 $\pm$ 0 <sup>a</sup> | 24 $\pm$ 1 <sup>b</sup>   |
| Total xanthophyll esters                            | 21 $\pm$ 0 <sup>b</sup>                           | 35 $\pm$ 0 <sup>h</sup>   | 48 $\pm$ 0 <sup>k</sup>  | 38 $\pm$ 0 <sup>i</sup>    | 25 $\pm$ 0 <sup>d</sup>  | 33 $\pm$ 0 <sup>g</sup>    | 34 $\pm$ 0 <sup>g</sup>   | 31 $\pm$ 0 <sup>f</sup>   | 36 $\pm$ 0 <sup>h</sup>   | 38 $\pm$ 0 <sup>i</sup>   | 27 $\pm$ 0 <sup>e</sup>   | 40 $\pm$ 0 <sup>j</sup>    | 24 $\pm$ 0 <sup>c</sup>  | 31 $\pm$ 1 <sup>f</sup>   | 36 $\pm$ 0 <sup>h</sup>   | 12 $\pm$ 0 <sup>a</sup> | 27 $\pm$ 0 <sup>e</sup>   |
| Total free xanthophylls                             | 9 $\pm$ 1 <sup>b</sup>                            | 27 $\pm$ 0 <sup>hi</sup>  | 28 $\pm$ 1 <sup>ij</sup> | 29 $\pm$ 1 <sup>j</sup>    | 15 $\pm$ 1 <sup>c</sup>  | 24 $\pm$ 0 <sup>f</sup>    | 21 $\pm$ 1 <sup>e</sup>   | 21 $\pm$ 0 <sup>e</sup>   | 26 $\pm$ 0 <sup>ghi</sup> | 25 $\pm$ 0 <sup>fgh</sup> | 18 $\pm$ 0 <sup>d</sup>   | 27 $\pm$ 1 <sup>hij</sup>  | 18 $\pm$ 1 <sup>d</sup>  | 24 $\pm$ 1 <sup>fg</sup>  | 24 $\pm$ 1 <sup>fg</sup>  | 6 $\pm$ 0 <sup>a</sup>  | 18 $\pm$ 0 <sup>d</sup>   |
| Total xanthophylls (free + esters)                  | 18 $\pm$ 0 <sup>b</sup>                           | 33 $\pm$ 0 <sup>h</sup>   | 43 $\pm$ 0 <sup>k</sup>  | 36 $\pm$ 1 <sup>j</sup>    | 22 $\pm$ 0 <sup>c</sup>  | 30 $\pm$ 0 <sup>g</sup>    | 30 $\pm$ 0 <sup>g</sup>   | 28 $\pm$ 0 <sup>e</sup>   | 33 $\pm$ 0 <sup>h</sup>   | 35 $\pm$ 0 <sup>i</sup>   | 24 $\pm$ 0 <sup>d</sup>   | 36 $\pm$ 0 <sup>j</sup>    | 22 $\pm$ 0 <sup>c</sup>  | 29 $\pm$ 1 <sup>f</sup>   | 33 $\pm$ 0 <sup>h</sup>   | 10 $\pm$ 0 <sup>a</sup> | 25 $\pm$ 0 <sup>d</sup>   |
| Total carotenoids                                   | 21 $\pm$ 0 <sup>b</sup>                           | 38 $\pm$ 0 <sup>gh</sup>  | 40 $\pm$ 0 <sup>ij</sup> | 34 $\pm$ 1 <sup>f</sup>    | 29 $\pm$ 0 <sup>d</sup>  | 41 $\pm$ 0 <sup>jk</sup>   | 37 $\pm$ 0 <sup>g</sup>   | 38 $\pm$ 1 <sup>g</sup>   | 42 $\pm$ 0 <sup>k</sup>   | 45 $\pm$ 0 <sup>l</sup>   | 32 $\pm$ 0 <sup>e</sup>   | 41 $\pm$ 1 <sup>jk</sup>   | 28 $\pm$ 0 <sup>d</sup>  | 42 $\pm$ 1 <sup>k</sup>   | 39 $\pm$ 1 <sup>hi</sup>  | 10 $\pm$ 0 <sup>a</sup> | 24 $\pm$ 0 <sup>c</sup>   |
| RAE                                                 | 13 $\pm$ 0 <sup>b</sup>                           | 24 $\pm$ 1 <sup>fg</sup>  | 34 $\pm$ 1 <sup>i</sup>  | 28 $\pm$ 0 <sup>h</sup>    | 18 $\pm$ 1 <sup>cd</sup> | 24 $\pm$ 1 <sup>fg</sup>   | 22 $\pm$ 1 <sup>ef</sup>  | 20 $\pm$ 1 <sup>de</sup>  | 25 $\pm$ 1 <sup>gh</sup>  | 25 $\pm$ 1 <sup>gh</sup>  | 17 $\pm$ 1 <sup>c</sup>   | 27 $\pm$ 1 <sup>h</sup>    | 16 $\pm$ 1 <sup>c</sup>  | 22 $\pm$ 1 <sup>ef</sup>  | 24 $\pm$ 0 <sup>fg</sup>  | 6 $\pm$ 0 <sup>a</sup>  | 16 $\pm$ 1 <sup>c</sup>   |

<sup>1</sup> Carotenoid quantification is accomplished by HPLC-DAD-MS/MS. The numbers correspond to run number listed in the Table 2. Letter “C” refers to control. All results are specified as the mean of two independent determinations  $\pm$  standard deviation. Results with different alphabets in the same row are significantly different (p < 0.05) from each other. Retinol activity equivalents are calculated according to guidelines of the United States (US) Institute of Medicine [41].

**Table S2.** Carotenoid extraction yields<sup>1</sup> obtained from papaya (*Carica papaya* L. cv. Sweet Mary) pulp tissue applying UAE using sunflower oil and ethanol as green extraction solvent.

| Compound                                            | Extraction yield in pulp sunflower oil extracts (%) |                           |                            |                          |                          |                            |                           |                          |                             |                           |                          |                          |                           |                           |                           |                           |                            |
|-----------------------------------------------------|-----------------------------------------------------|---------------------------|----------------------------|--------------------------|--------------------------|----------------------------|---------------------------|--------------------------|-----------------------------|---------------------------|--------------------------|--------------------------|---------------------------|---------------------------|---------------------------|---------------------------|----------------------------|
|                                                     | C                                                   | 1                         | 2                          | 3                        | 4                        | 5                          | 6                         | 7                        | 8                           | 9                         | 10                       | 11                       | 12                        | 13                        | 14                        | 15                        | 16                         |
| (9Z)- $\alpha$ -cryptoxanthin                       | 0 $\pm$ 0 <sup>a</sup>                              | 40 $\pm$ 4 <sup>k</sup>   | 33 $\pm$ 2 <sup>ghij</sup> | 37 $\pm$ 2 <sup>jk</sup> | 22 $\pm$ 1 <sup>de</sup> | 32 $\pm$ 1 <sup>fghi</sup> | 0 $\pm$ 0 <sup>a</sup>    | 20 $\pm$ 1 <sup>c</sup>  | 31 $\pm$ 1 <sup>efghi</sup> | 35 $\pm$ 0 <sup>hij</sup> | 26 $\pm$ 2 <sup>de</sup> | 27 $\pm$ 2 <sup>ef</sup> | 27 $\pm$ 1 <sup>de</sup>  | 28 $\pm$ 1 <sup>efg</sup> | 35 $\pm$ 1 <sup>ijk</sup> | 9 $\pm$ 0 <sup>b</sup>    | 30 $\pm$ 0 <sup>efgh</sup> |
| (all- <i>E</i> )- $\alpha$ -cryptoxanthin           | 0 $\pm$ 0 <sup>a</sup>                              | 16 $\pm$ 1 <sup>f</sup>   | 20 $\pm$ 0 <sup>h</sup>    | 18 $\pm$ 0 <sup>gh</sup> | 8 $\pm$ 0 <sup>c</sup>   | 12 $\pm$ 0 <sup>e</sup>    | 0 $\pm$ 0 <sup>a</sup>    | 8 $\pm$ 0 <sup>cd</sup>  | 10 $\pm$ 0 <sup>d</sup>     | 12 $\pm$ 0 <sup>e</sup>   | 10 $\pm$ 0 <sup>d</sup>  | 18 $\pm$ 0 <sup>g</sup>  | 16 $\pm$ 0 <sup>f</sup>   | 13 $\pm$ 1 <sup>e</sup>   | 15 $\pm$ 0 <sup>f</sup>   | 3 $\pm$ 0 <sup>b</sup>    | 15 $\pm$ 1 <sup>f</sup>    |
| (all- <i>E</i> )- $\beta$ -cryptoxanthin            | 5 $\pm$ 0 <sup>ab</sup>                             | 15 $\pm$ 1 <sup>d</sup>   | 16 $\pm$ 1 <sup>d</sup>    | 34 $\pm$ 1 <sup>g</sup>  | 7 $\pm$ 0 <sup>b</sup>   | 16 $\pm$ 0 <sup>d</sup>    | 6 $\pm$ 0 <sup>b</sup>    | 16 $\pm$ 0 <sup>d</sup>  | 24 $\pm$ 1 <sup>e</sup>     | 25 $\pm$ 1 <sup>e</sup>   | 9 $\pm$ 0 <sup>c</sup>   | 30 $\pm$ 1 <sup>f</sup>  | 10 $\pm$ 0 <sup>c</sup>   | 24 $\pm$ 0 <sup>e</sup>   | 25 $\pm$ 1 <sup>e</sup>   | 3 $\pm$ 0 <sup>a</sup>    | 15 $\pm$ 0 <sup>d</sup>    |
| (9Z)-violaxanthin laurate                           | 32 $\pm$ 0 <sup>c</sup>                             | 41 $\pm$ 0 <sup>d</sup>   | 32 $\pm$ 1 <sup>c</sup>    | 63 $\pm$ 4 <sup>f</sup>  | 10 $\pm$ 0 <sup>b</sup>  | 48 $\pm$ 0 <sup>e</sup>    | 14 $\pm$ 0 <sup>b</sup>   | 43 $\pm$ 2 <sup>de</sup> | 71 $\pm$ 3 <sup>g</sup>     | 91 $\pm$ 4 <sup>h</sup>   | 16 $\pm$ 1 <sup>b</sup>  | 93 $\pm$ 3 <sup>h</sup>  | 34 $\pm$ 0 <sup>c</sup>   | 73 $\pm$ 0 <sup>g</sup>   | 0 $\pm$ 0 <sup>a</sup>    | 0 $\pm$ 0 <sup>a</sup>    | 15 $\pm$ 0 <sup>b</sup>    |
| (all- <i>E</i> )-lutein-3- <i>O</i> -myristate      | 16 $\pm$ 0 <sup>f</sup>                             | 17 $\pm$ 1 <sup>f</sup>   | 8 $\pm$ 0 <sup>c</sup>     | 33 $\pm$ 0 <sup>i</sup>  | 4 $\pm$ 0 <sup>b</sup>   | 27 $\pm$ 2 <sup>h</sup>    | 32 $\pm$ 1 <sup>i</sup>   | 20 $\pm$ 0 <sup>g</sup>  | 36 $\pm$ 0 <sup>i</sup>     | 33 $\pm$ 1 <sup>i</sup>   | 13 $\pm$ 0 <sup>d</sup>  | 33 $\pm$ 1 <sup>i</sup>  | 15 $\pm$ 0 <sup>ef</sup>  | 32 $\pm$ 1 <sup>i</sup>   | 0 $\pm$ 0 <sup>a</sup>    | 0 $\pm$ 0 <sup>a</sup>    | 13 $\pm$ 1 <sup>de</sup>   |
| (all- <i>E</i> )- $\beta$ -carotene                 | 11 $\pm$ 0 <sup>f</sup>                             | 7 $\pm$ 0 <sup>cd</sup>   | 6 $\pm$ 0 <sup>c</sup>     | 16 $\pm$ 0 <sup>h</sup>  | 2 $\pm$ 0 <sup>a</sup>   | 9 $\pm$ 0 <sup>e</sup>     | 12 $\pm$ 0 <sup>g</sup>   | 8 $\pm$ 0 <sup>d</sup>   | 12 $\pm$ 0 <sup>g</sup>     | 13 $\pm$ 0 <sup>g</sup>   | 4 $\pm$ 0 <sup>b</sup>   | 13 $\pm$ 0 <sup>g</sup>  | 8 $\pm$ 0 <sup>d</sup>    | 11 $\pm$ 0 <sup>f</sup>   | 11 $\pm$ 0 <sup>f</sup>   | 1 $\pm$ 0 <sup>a</sup>    | 7 $\pm$ 0 <sup>cd</sup>    |
| (all- <i>E</i> )-antheraxanthin myristate palmitate | 14 $\pm$ 0 <sup>b</sup>                             | 42 $\pm$ 0 <sup>k</sup>   | 30 $\pm$ 1 <sup>ij</sup>   | 22 $\pm$ 1 <sup>e</sup>  | 19 $\pm$ 0 <sup>d</sup>  | 28 $\pm$ 0 <sup>fghi</sup> | 16 $\pm$ 0 <sup>c</sup>   | 19 $\pm$ 0 <sup>d</sup>  | 25 $\pm$ 1 <sup>f</sup>     | 31 $\pm$ 1 <sup>j</sup>   | 23 $\pm$ 0 <sup>ef</sup> | 53 $\pm$ 0 <sup>l</sup>  | 12 $\pm$ 0 <sup>ab</sup>  | 27 $\pm$ 1 <sup>g</sup>   | 28 $\pm$ 1 <sup>gh</sup>  | 10 $\pm$ 0 <sup>a</sup>   | 29 $\pm$ 1 <sup>hij</sup>  |
| (all- <i>E</i> )-violaxanthin palmitate             | 0 $\pm$ 0 <sup>a</sup>                              | 10 $\pm$ 0 <sup>g</sup>   | 6 $\pm$ 0 <sup>de</sup>    | 9 $\pm$ 1 <sup>fg</sup>  | 4 $\pm$ 0 <sup>bcd</sup> | 7 $\pm$ 0 <sup>def</sup>   | 0 $\pm$ 0 <sup>a</sup>    | 0 $\pm$ 0 <sup>a</sup>   | 9 $\pm$ 0 <sup>efg</sup>    | 10 $\pm$ 1 <sup>g</sup>   | 6 $\pm$ 0 <sup>cde</sup> | 71 $\pm$ 3 <sup>h</sup>  | 3 $\pm$ 0 <sup>ab</sup>   | 6 $\pm$ 0 <sup>de</sup>   | 7 $\pm$ 0 <sup>def</sup>  | 0 $\pm$ 0 <sup>a</sup>    | 3 $\pm$ 0 <sup>bc</sup>    |
| (9Z)-neoxanthin dibutyrate                          | 20 $\pm$ 1 <sup>g</sup>                             | 18 $\pm$ 0 <sup>f</sup>   | 8 $\pm$ 0 <sup>b</sup>     | 16 $\pm$ 0 <sup>e</sup>  | 7 $\pm$ 0 <sup>b</sup>   | 8 $\pm$ 0 <sup>b</sup>     | 0 $\pm$ 0 <sup>a</sup>    | 0 $\pm$ 0 <sup>a</sup>   | 0 $\pm$ 0 <sup>a</sup>      | 0 $\pm$ 0 <sup>a</sup>    | 10 $\pm$ 1 <sup>c</sup>  | 17 $\pm$ 0 <sup>f</sup>  | 7 $\pm$ 0 <sup>b</sup>    | 11 $\pm$ 1 <sup>d</sup>   | 11 $\pm$ 0 <sup>d</sup>   | 0 $\pm$ 0 <sup>a</sup>    | 0 $\pm$ 0 <sup>a</sup>     |
| (all- <i>E</i> )- $\beta$ -cryptoxanthin caprate    | 16 $\pm$ 1 <sup>bc</sup>                            | 30 $\pm$ 2 <sup>fg</sup>  | 27 $\pm$ 1 <sup>f</sup>    | 31 $\pm$ 1 <sup>gh</sup> | 15 $\pm$ 1 <sup>bc</sup> | 24 $\pm$ 1 <sup>e</sup>    | 14 $\pm$ 1 <sup>b</sup>   | 17 $\pm$ 0 <sup>bc</sup> | 21 $\pm$ 1 <sup>de</sup>    | 27 $\pm$ 1 <sup>f</sup>   | 17 $\pm$ 1 <sup>bc</sup> | 24 $\pm$ 1 <sup>e</sup>  | 18 $\pm$ 1 <sup>cd</sup>  | 34 $\pm$ 1 <sup>h</sup>   | 28 $\pm$ 1 <sup>fg</sup>  | 6 $\pm$ 0 <sup>a</sup>    | 16 $\pm$ 1 <sup>bc</sup>   |
| (all- <i>E</i> )-lutein dimyristate                 | 25 $\pm$ 0 <sup>cd</sup>                            | 91 $\pm$ 4 <sup>i</sup>   | 53 $\pm$ 1 <sup>h</sup>    | 27 $\pm$ 1 <sup>de</sup> | 36 $\pm$ 1 <sup>f</sup>  | 27 $\pm$ 0 <sup>de</sup>   | 20 $\pm$ 1 <sup>abc</sup> | 15 $\pm$ 2 <sup>a</sup>  | 19 $\pm$ 1 <sup>ab</sup>    | 23 $\pm$ 1 <sup>bcd</sup> | 46 $\pm$ 2 <sup>g</sup>  | 29 $\pm$ 0 <sup>e</sup>  | 16 $\pm$ 1 <sup>a</sup>   | 29 $\pm$ 3 <sup>e</sup>   | 20 $\pm$ 1 <sup>ab</sup>  | 20 $\pm$ 0 <sup>abc</sup> | 50 $\pm$ 2 <sup>gh</sup>   |
| (all- <i>E</i> )- $\beta$ -cryptoxanthin laurate    | 33 $\pm$ 2 <sup>cde</sup>                           | 39 $\pm$ 0 <sup>def</sup> | 38 $\pm$ 1 <sup>def</sup>  | 62 $\pm$ 3 <sup>h</sup>  | 21 $\pm$ 0 <sup>b</sup>  | 34 $\pm$ 1 <sup>cde</sup>  | 30 $\pm$ 2 <sup>c</sup>   | 33 $\pm$ 2 <sup>cd</sup> | 44 $\pm$ 2 <sup>f</sup>     | 51 $\pm$ 4 <sup>g</sup>   | 23 $\pm$ 0 <sup>b</sup>  | 43 $\pm$ 1 <sup>f</sup>  | 34 $\pm$ 0 <sup>cde</sup> | 55 $\pm$ 1 <sup>g</sup>   | 55 $\pm$ 2 <sup>g</sup>   | 6 $\pm$ 0 <sup>a</sup>    | 40 $\pm$ 2 <sup>ef</sup>   |
| (all- <i>E</i> )-antheraxanthin laurate myristate   | 21 $\pm$ 2 <sup>cd</sup>                            | 49 $\pm$ 3 <sup>gh</sup>  | 50 $\pm$ 2 <sup>h</sup>    | 21 $\pm$ 0 <sup>cd</sup> | 30 $\pm$ 3 <sup>e</sup>  | 37 $\pm$ 0 <sup>f</sup>    | 25 $\pm$ 1 <sup>de</sup>  | 15 $\pm$ 0 <sup>bc</sup> | 14 $\pm$ 1 <sup>b</sup>     | 9 $\pm$ 0 <sup>b</sup>    | 42 $\pm$ 2 <sup>fg</sup> | 22 $\pm$ 0 <sup>cd</sup> | 42 $\pm$ 1 <sup>fg</sup>  | 22 $\pm$ 0 <sup>cd</sup>  | 24 $\pm$ 2 <sup>de</sup>  | 0 $\pm$ 0 <sup>a</sup>    | 79 $\pm$ 3 <sup>i</sup>    |
| (all- <i>E</i> )- $\beta$ -cryptoxanthin myristate  | 15 $\pm$ 1 <sup>ab</sup>                            | 81 $\pm$ 4 <sup>g</sup>   | 27 $\pm$ 1 <sup>de</sup>   | 28 $\pm$ 0 <sup>e</sup>  | 24 $\pm$ 2 <sup>de</sup> | 27 $\pm$ 0 <sup>de</sup>   | 13 $\pm$ 0 <sup>ab</sup>  | 14 $\pm$ 0 <sup>ab</sup> | 20 $\pm$ 0 <sup>c</sup>     | 23 $\pm$ 1 <sup>cd</sup>  | 38 $\pm$ 2 <sup>f</sup>  | 25 $\pm$ 1 <sup>de</sup> | 15 $\pm$ 1 <sup>ab</sup>  | 25 $\pm$ 0 <sup>de</sup>  | 27 $\pm$ 0 <sup>de</sup>  | 11 $\pm$ 0 <sup>a</sup>   | 16 $\pm$ 0 <sup>b</sup>    |
| (13Z)-lycopene isomer 2                             | 0 $\pm$ 0 <sup>a</sup>                              | 45 $\pm$ 0 <sup>g</sup>   | 83 $\pm$ 2 <sup>i</sup>    | 31 $\pm$ 1 <sup>e</sup>  | 30 $\pm$ 3 <sup>e</sup>  | 59 $\pm$ 0 <sup>h</sup>    | 19 $\pm$ 1 <sup>d</sup>   | 32 $\pm$ 0 <sup>e</sup>  | 32 $\pm$ 1 <sup>e</sup>     | 59 $\pm$ 2 <sup>h</sup>   | 34 $\pm$ 1 <sup>e</sup>  | 40 $\pm$ 1 <sup>f</sup>  | 22 $\pm$ 1 <sup>d</sup>   | 57 $\pm$ 1 <sup>h</sup>   | 79 $\pm$ 2 <sup>i</sup>   | 7 $\pm$ 0 <sup>b</sup>    | 13 $\pm$ 0 <sup>c</sup>    |
| (9Z)-lycopene isomer 4                              | 0 $\pm$ 0 <sup>a</sup>                              | 40 $\pm$ 2 <sup>g</sup>   | 77 $\pm$ 1 <sup>k</sup>    | 14 $\pm$ 1 <sup>c</sup>  | 22 $\pm$ 1 <sup>d</sup>  | 50 $\pm$ 2 <sup>j</sup>    | 13 $\pm$ 1 <sup>c</sup>   | 27 $\pm$ 0 <sup>e</sup>  | 26 $\pm$ 1 <sup>e</sup>     | 39 $\pm$ 2 <sup>g</sup>   | 45 $\pm$ 0 <sup>hi</sup> | 19 $\pm$ 0 <sup>d</sup>  | 34 $\pm$ 1 <sup>f</sup>   | 44 $\pm$ 1 <sup>h</sup>   | 48 $\pm$ 1 <sup>ij</sup>  | 7 $\pm$ 0 <sup>b</sup>    | 20 $\pm$ 0 <sup>d</sup>    |
| (all- <i>E</i> )-lycopene                           | 29 $\pm$ 1 <sup>bc</sup>                            | 39 $\pm$ 0 <sup>e</sup>   | 49 $\pm$ 1 <sup>f</sup>    | 40 $\pm$ 0 <sup>e</sup>  | 32 $\pm$ 1 <sup>cd</sup> | 77 $\pm$ 1 <sup>h</sup>    | 50 $\pm$ 1 <sup>f</sup>   | 57 $\pm$ 1 <sup>g</sup>  | 76 $\pm$ 2 <sup>h</sup>     | 95 $\pm$ 4 <sup>i</sup>   | 52 $\pm$ 1 <sup>f</sup>  | 33 $\pm$ 0 <sup>d</sup>  | 28 $\pm$ 0 <sup>bc</sup>  | 48 $\pm$ 0 <sup>f</sup>   | 82 $\pm$ 1 <sup>i</sup>   | 3 $\pm$ 0 <sup>a</sup>    | 28 $\pm$ 0 <sup>b</sup>    |
| Total hydrocarbon carotenoids                       | 21 $\pm$ 1 <sup>b</sup>                             | 29 $\pm$ 0 <sup>d</sup>   | 39 $\pm$ 1 <sup>g</sup>    | 29 $\pm$ 0 <sup>d</sup>  | 21 $\pm$ 1 <sup>b</sup>  | 50 $\pm$ 1 <sup>i</sup>    | 31 $\pm$ 1 <sup>e</sup>   | 36 $\pm$ 1 <sup>f</sup>  | 47 $\pm$ 1 <sup>h</sup>     | 59 $\pm$ 2 <sup>k</sup>   | 34 $\pm$ 0 <sup>ef</sup> | 25 $\pm$ 1 <sup>c</sup>  | 21 $\pm$ 0 <sup>b</sup>   | 35 $\pm$ 0 <sup>f</sup>   | 54 $\pm$ 1 <sup>j</sup>   | 3 $\pm$ 0 <sup>a</sup>    | 19 $\pm$ 0 <sup>b</sup>    |
| Total xanthophyll esters                            | 20 $\pm$ 0 <sup>c</sup>                             | 38 $\pm$ 0 <sup>k</sup>   | 27 $\pm$ 0 <sup>g</sup>    | 36 $\pm$ 0 <sup>j</sup>  | 16 $\pm$ 0 <sup>b</sup>  | 28 $\pm$ 1 <sup>g</sup>    | 21 $\pm$ 0 <sup>cd</sup>  | 20 $\pm$ 0 <sup>cd</sup> | 30 $\pm$ 0 <sup>h</sup>     | 34 $\pm$ 1 <sup>i</sup>   | 21 $\pm$ 0 <sup>d</sup>  | 40 $\pm$ 1 <sup>l</sup>  | 20 $\pm$ 0 <sup>c</sup>   | 35 $\pm$ 0 <sup>ij</sup>  | 24 $\pm$ 0 <sup>e</sup>   | 6 $\pm$ 0 <sup>a</sup>    | 26 $\pm$ 0 <sup>f</sup>    |
| Total free xanthophylls                             | 5 $\pm$ 0 <sup>a</sup>                              | 18 $\pm$ 0 <sup>f</sup>   | 19 $\pm$ 1 <sup>f</sup>    | 32 $\pm$ 1 <sup>j</sup>  | 8 $\pm$ 0 <sup>b</sup>   | 17 $\pm$ 0 <sup>ef</sup>   | 5 $\pm$ 0 <sup>a</sup>    | 15 $\pm$ 0 <sup>e</sup>  | 22 $\pm$ 1 <sup>g</sup>     | 24 $\pm$ 1 <sup>h</sup>   | 11 $\pm$ 0 <sup>c</sup>  | 28 $\pm$ 1 <sup>i</sup>  | 13 $\pm$ 0 <sup>d</sup>   | 22 $\pm$ 0 <sup>gh</sup>  | 24 $\pm$ 1 <sup>h</sup>   | 4 $\pm$ 0 <sup>a</sup>    | 17 $\pm$ 0 <sup>ef</sup>   |
| Total xanthophylls (free + esters)                  | 17 $\pm$ 0 <sup>c</sup>                             | 32 $\pm$ 0 <sup>h</sup>   | 25 $\pm$ 1 <sup>f</sup>    | 35 $\pm$ 0 <sup>i</sup>  | 14 $\pm$ 0 <sup>b</sup>  | 25 $\pm$ 1 <sup>f</sup>    | 16 $\pm$ 0 <sup>c</sup>   | 19 $\pm$ 0 <sup>d</sup>  | 28 $\pm$ 0 <sup>g</sup>     | 31 $\pm$ 1 <sup>h</sup>   | 19 $\pm$ 0 <sup>d</sup>  | 37 $\pm$ 1 <sup>j</sup>  | 18 $\pm$ 0 <sup>d</sup>   | 32 $\pm$ 0 <sup>h</sup>   | 24 $\pm$ 0 <sup>ef</sup>  | 5 $\pm$ 0 <sup>a</sup>    | 23 $\pm$ 0 <sup>e</sup>    |
| Total carotenoids                                   | 19 $\pm$ 0 <sup>bc</sup>                            | 31 $\pm$ 0 <sup>f</sup>   | 31 $\pm$ 1 <sup>f</sup>    | 32 $\pm$ 0 <sup>fg</sup> | 17 $\pm$ 1 <sup>b</sup>  | 35 $\pm$ 1 <sup>h</sup>    | 23 $\pm$ 1 <sup>d</sup>   | 26 $\pm$ 0 <sup>e</sup>  | 36 $\pm$ 0 <sup>h</sup>     | 43 $\pm$ 2 <sup>i</sup>   | 25 $\pm$ 0 <sup>e</sup>  | 32 $\pm$ 1 <sup>fg</sup> | 19 $\pm$ 0 <sup>c</sup>   | 33 $\pm$ 0 <sup>g</sup>   | 37 $\pm$ 0 <sup>h</sup>   | 4 $\pm$ 0 <sup>a</sup>    | 21 $\pm$ 0 <sup>d</sup>    |
| RAE                                                 | 14 $\pm$ 0 <sup>d</sup>                             | 22 $\pm$ 1 <sup>fg</sup>  | 18 $\pm$ 0 <sup>e</sup>    | 30 $\pm$ 1 <sup>i</sup>  | 9 $\pm$ 0 <sup>b</sup>   | 18 $\pm$ 0 <sup>e</sup>    | 15 $\pm$ 1 <sup>d</sup>   | 15 $\pm$ 0 <sup>d</sup>  | 21 $\pm$ 1 <sup>f</sup>     | 24 $\pm$ 0 <sup>h</sup>   | 12 $\pm$ 0 <sup>c</sup>  | 24 $\pm$ 0 <sup>gh</sup> | 15 $\pm$ 1 <sup>d</sup>   | 24 $\pm$ 1 <sup>h</sup>   | 24 $\pm$ 1 <sup>h</sup>   | 4 $\pm$ 0 <sup>a</sup>    | 16 $\pm$ 1 <sup>d</sup>    |

<sup>1</sup> Carotenoid quantification is accomplished by HPLC-DAD-MS/MS. The numbers correspond to run number listed in the Table 2. Letter “C” refers to control. All results are specified as the mean of two independent determinations  $\pm$  standard deviation. Results with different alphabets in the same row are significantly different (p < 0.05) from each other. Retinol activity equivalents (RAE) are calculated ( $\mu$ g carotenoids/100 g fresh weight) according to guidelines of the United States (US) Institute of Medicine [41].

**Table S3.** Carotenoid extraction yields<sup>1</sup> obtained from papaya (*Carica papaya* L. cv. Sweet Mary) peel tissue applying UAE using soybean oil and ethanol as green extraction solvent.

| Compound                                   | Extraction yield in peel soybean oil extracts (%) |                       |                     |                       |                       |                       |                       |                       |                        |                       |                      |                       |                        |                       |                        |                        |                        |
|--------------------------------------------|---------------------------------------------------|-----------------------|---------------------|-----------------------|-----------------------|-----------------------|-----------------------|-----------------------|------------------------|-----------------------|----------------------|-----------------------|------------------------|-----------------------|------------------------|------------------------|------------------------|
|                                            | C                                                 | 1                     | 2                   | 3                     | 4                     | 5                     | 6                     | 7                     | 8                      | 9                     | 10                   | 11                    | 12                     | 13                    | 14                     | 15                     | 16                     |
| (9Z)-α-cryptoxanthin                       | 0 ± 0 <sup>a</sup>                                | 57 ± 3 <sup>d</sup>   | 54 ± 1 <sup>d</sup> | 66 ± 2 <sup>ef</sup>  | 75 ± 1 <sup>g</sup>   | 68 ± 2 <sup>ef</sup>  | 66 ± 3 <sup>ef</sup>  | 81 ± 0 <sup>h</sup>   | 65 ± 1 <sup>e</sup>    | 58 ± 1 <sup>d</sup>   | 56 ± 1 <sup>d</sup>  | 71 ± 1 <sup>fg</sup>  | 38 ± 0 <sup>c</sup>    | 29 ± 1 <sup>b</sup>   | 65 ± 1 <sup>ef</sup>   | 74 ± 3 <sup>g</sup>    | 41 ± 2 <sup>c</sup>    |
| (all-E)-α-cryptoxanthin                    | 0 ± 0 <sup>a</sup>                                | 24 ± 1 <sup>g</sup>   | 21 ± 0 <sup>f</sup> | 18 ± 0 <sup>d</sup>   | 26 ± 0 <sup>h</sup>   | 19 ± 0 <sup>de</sup>  | 18 ± 0 <sup>d</sup>   | 23 ± 1 <sup>g</sup>   | 21 ± 1 <sup>f</sup>    | 14 ± 1 <sup>c</sup>   | 15 ± 0 <sup>c</sup>  | 20 ± 0 <sup>ef</sup>  | 19 ± 1 <sup>de</sup>   | 12 ± 0 <sup>b</sup>   | 24 ± 0 <sup>g</sup>    | 27 ± 0 <sup>h</sup>    | 24 ± 1 <sup>g</sup>    |
| (all-E)-β-cryptoxanthin                    | 13 ± 0 <sup>a</sup>                               | 52 ± 1 <sup>g</sup>   | 19 ± 0 <sup>b</sup> | 44 ± 0 <sup>de</sup>  | 47 ± 1 <sup>ef</sup>  | 47 ± 0 <sup>ef</sup>  | 44 ± 1 <sup>de</sup>  | 37 ± 1 <sup>c</sup>   | 42 ± 2 <sup>d</sup>    | 41 ± 2 <sup>d</sup>   | 36 ± 1 <sup>c</sup>  | 45 ± 0 <sup>def</sup> | 44 ± 0 <sup>de</sup>   | 44 ± 1 <sup>de</sup>  | 48 ± 0 <sup>f</sup>    | 46 ± 0 <sup>ef</sup>   | 43 ± 2 <sup>de</sup>   |
| (9Z)-violaxanthin laurate                  | 18 ± 1 <sup>a</sup>                               | 58 ± 2 <sup>e</sup>   | 18 ± 1 <sup>a</sup> | 33 ± 1 <sup>b</sup>   | 46 ± 1 <sup>d</sup>   | 49 ± 2 <sup>d</sup>   | 62 ± 0 <sup>ef</sup>  | 50 ± 1 <sup>d</sup>   | 40 ± 0 <sup>c</sup>    | 62 ± 2 <sup>ef</sup>  | 49 ± 0 <sup>d</sup>  | 70 ± 2 <sup>gh</sup>  | 65 ± 1 <sup>f</sup>    | 66 ± 1 <sup>fg</sup>  | 71 ± 2 <sup>h</sup>    | 62 ± 0 <sup>ef</sup>   | 38 ± 2 <sup>c</sup>    |
| (all-E)-lutein-3-O-myristate               | 14 ± 0 <sup>a</sup>                               | 54 ± 2 <sup>g</sup>   | 14 ± 1 <sup>a</sup> | 31 ± 1 <sup>b</sup>   | 49 ± 2 <sup>efg</sup> | 30 ± 2 <sup>b</sup>   | 45 ± 1 <sup>de</sup>  | 39 ± 1 <sup>c</sup>   | 19 ± 1 <sup>a</sup>    | 38 ± 2 <sup>c</sup>   | 38 ± 1 <sup>c</sup>  | 47 ± 1 <sup>ef</sup>  | 48 ± 3 <sup>ef</sup>   | 55 ± 2 <sup>g</sup>   | 50 ± 1 <sup>efg</sup>  | 51 ± 1 <sup>fg</sup>   | 40 ± 2 <sup>cd</sup>   |
| (all-E)-β-carotene                         | 7 ± 0 <sup>a</sup>                                | 26 ± 0 <sup>g</sup>   | 13 ± 0 <sup>b</sup> | 21 ± 0 <sup>de</sup>  | 26 ± 0 <sup>g</sup>   | 23 ± 0 <sup>f</sup>   | 21 ± 1 <sup>de</sup>  | 19 ± 0 <sup>c</sup>   | 20 ± 1 <sup>cde</sup>  | 19 ± 1 <sup>cde</sup> | 19 ± 0 <sup>cd</sup> | 21 ± 0 <sup>e</sup>   | 23 ± 0 <sup>f</sup>    | 19 ± 0 <sup>cd</sup>  | 20 ± 0 <sup>cde</sup>  | 24 ± 0 <sup>f</sup>    | 27 ± 1 <sup>g</sup>    |
| (all-E)-antheraxanthin myristate palmitate | 12 ± 0 <sup>a</sup>                               | 46 ± 0 <sup>cd</sup>  | 15 ± 0 <sup>a</sup> | 36 ± 0 <sup>b</sup>   | 73 ± 5 <sup>h</sup>   | 42 ± 1 <sup>bc</sup>  | 47 ± 1 <sup>cde</sup> | 47 ± 2 <sup>cde</sup> | 51 ± 1 <sup>def</sup>  | 41 ± 1 <sup>bc</sup>  | 61 ± 0 <sup>g</sup>  | 41 ± 2 <sup>bc</sup>  | 56 ± 4 <sup>fg</sup>   | 53 ± 2 <sup>ef</sup>  | 45 ± 2 <sup>cd</sup>   | 72 ± 2 <sup>h</sup>    | 81 ± 1 <sup>i</sup>    |
| (all-E)-violaxanthin palmitate             | 5 ± 0 <sup>a</sup>                                | 18 ± 0 <sup>g</sup>   | 9 ± 0 <sup>b</sup>  | 13 ± 0 <sup>cd</sup>  | 22 ± 2 <sup>h</sup>   | 15 ± 0 <sup>de</sup>  | 17 ± 1 <sup>efg</sup> | 13 ± 1 <sup>c</sup>   | 16 ± 0 <sup>efg</sup>  | 13 ± 1 <sup>cd</sup>  | 16 ± 0 <sup>ef</sup> | 16 ± 0 <sup>efg</sup> | 16 ± 0 <sup>ef</sup>   | 15 ± 1 <sup>ef</sup>  | 17 ± 0 <sup>fg</sup>   | 23 ± 0 <sup>h</sup>    | 33 ± 1 <sup>i</sup>    |
| (9Z)-neoxanthin dibutyrate                 | 11 ± 0 <sup>a</sup>                               | 39 ± 0 <sup>de</sup>  | 9 ± 0 <sup>a</sup>  | 26 ± 1 <sup>b</sup>   | 46 ± 0 <sup>f</sup>   | 37 ± 1 <sup>d</sup>   | 31 ± 1 <sup>c</sup>   | 31 ± 0 <sup>c</sup>   | 35 ± 0 <sup>d</sup>    | 23 ± 0 <sup>b</sup>   | 36 ± 1 <sup>d</sup>  | 32 ± 2 <sup>c</sup>   | 44 ± 3 <sup>f</sup>    | 42 ± 1 <sup>ef</sup>  | 42 ± 0 <sup>ef</sup>   | 50 ± 1 <sup>g</sup>    | 53 ± 1 <sup>g</sup>    |
| (all-E)-β-cryptoxanthin caprate            | 11 ± 0 <sup>a</sup>                               | 36 ± 1 <sup>de</sup>  | 23 ± 1 <sup>b</sup> | 33 ± 1 <sup>c</sup>   | 43 ± 1 <sup>g</sup>   | 36 ± 1 <sup>de</sup>  | 39 ± 0 <sup>ef</sup>  | 38 ± 0 <sup>de</sup>  | 38 ± 0 <sup>de</sup>   | 33 ± 1 <sup>c</sup>   | 43 ± 1 <sup>g</sup>  | 35 ± 1 <sup>cd</sup>  | 41 ± 0 <sup>fg</sup>   | 38 ± 1 <sup>de</sup>  | 38 ± 1 <sup>de</sup>   | 46 ± 1 <sup>h</sup>    | 49 ± 2 <sup>i</sup>    |
| (all-E)-lutein dimyristate                 | 14 ± 0 <sup>a</sup>                               | 45 ± 1 <sup>efg</sup> | 49 ± 2 <sup>g</sup> | 35 ± 2 <sup>bc</sup>  | 62 ± 1 <sup>h</sup>   | 44 ± 2 <sup>efg</sup> | 42 ± 1 <sup>def</sup> | 38 ± 1 <sup>bcd</sup> | 38 ± 2 <sup>bcd</sup>  | 35 ± 2 <sup>bc</sup>  | 48 ± 1 <sup>g</sup>  | 33 ± 1 <sup>b</sup>   | 45 ± 1 <sup>fg</sup>   | 44 ± 0 <sup>efg</sup> | 40 ± 1 <sup>cde</sup>  | 66 ± 2 <sup>h</sup>    | 72 ± 3 <sup>i</sup>    |
| (all-E)-β-cryptoxanthin laurate            | 22 ± 0 <sup>a</sup>                               | 88 ± 2 <sup>k</sup>   | 37 ± 0 <sup>b</sup> | 71 ± 0 <sup>de</sup>  | 85 ± 0 <sup>jk</sup>  | 79 ± 2 <sup>hi</sup>  | 74 ± 1 <sup>efg</sup> | 66 ± 1 <sup>c</sup>   | 71 ± 1 <sup>def</sup>  | 68 ± 1 <sup>cd</sup>  | 65 ± 1 <sup>c</sup>  | 74 ± 1 <sup>efg</sup> | 72 ± 1 <sup>efg</sup>  | 76 ± 3 <sup>gh</sup>  | 82 ± 0 <sup>ij</sup>   | 80 ± 0 <sup>i</sup>    | 75 ± 1 <sup>fg</sup>   |
| (all-E)-antheraxanthin laurate myristate   | 5 ± 0 <sup>a</sup>                                | 17 ± 0 <sup>cde</sup> | 73 ± 1 <sup>l</sup> | 13 ± 1 <sup>b</sup>   | 48 ± 0 <sup>j</sup>   | 18 ± 0 <sup>ef</sup>  | 18 ± 1 <sup>f</sup>   | 18 ± 1 <sup>f</sup>   | 15 ± 0 <sup>c</sup>    | 13 ± 0 <sup>b</sup>   | 25 ± 0 <sup>h</sup>  | 16 ± 1 <sup>cd</sup>  | 22 ± 0 <sup>g</sup>    | 17 ± 1 <sup>def</sup> | 16 ± 1 <sup>cde</sup>  | 59 ± 0 <sup>k</sup>    | 41 ± 1 <sup>i</sup>    |
| (all-E)-β-cryptoxanthin myristate          | 8 ± 0 <sup>a</sup>                                | 25 ± 0 <sup>fg</sup>  | 15 ± 0 <sup>b</sup> | 21 ± 1 <sup>c</sup>   | 30 ± 0 <sup>k</sup>   | 27 ± 1 <sup>ij</sup>  | 23 ± 0 <sup>d</sup>   | 21 ± 1 <sup>c</sup>   | 21 ± 0 <sup>c</sup>    | 20 ± 1 <sup>c</sup>   | 21 ± 0 <sup>c</sup>  | 24 ± 0 <sup>ef</sup>  | 23 ± 0 <sup>de</sup>   | 25 ± 0 <sup>fg</sup>  | 28 ± 0 <sup>j</sup>    | 27 ± 0 <sup>hi</sup>   | 26 ± 0 <sup>gh</sup>   |
| (13Z)-lycopene isomer 2                    | 0 ± 0 <sup>a</sup>                                | 57 ± 2 <sup>g</sup>   | 33 ± 0 <sup>b</sup> | 33 ± 0 <sup>b</sup>   | 49 ± 2 <sup>de</sup>  | 71 ± 1 <sup>h</sup>   | 70 ± 1 <sup>h</sup>   | 48 ± 2 <sup>d</sup>   | 42 ± 1 <sup>c</sup>    | 41 ± 1 <sup>c</sup>   | 41 ± 1 <sup>c</sup>  | 52 ± 1 <sup>ef</sup>  | 75 ± 3 <sup>i</sup>    | 53 ± 1 <sup>efg</sup> | 46 ± 0 <sup>d</sup>    | 54 ± 1 <sup>fg</sup>   | 41 ± 1 <sup>c</sup>    |
| (9Z)-lycopene isomer 4                     | 0 ± 0 <sup>a</sup>                                | 43 ± 0 <sup>ef</sup>  | 24 ± 0 <sup>b</sup> | 27 ± 0 <sup>b</sup>   | 38 ± 1 <sup>cd</sup>  | 65 ± 2 <sup>j</sup>   | 63 ± 1 <sup>j</sup>   | 54 ± 1 <sup>h</sup>   | 45 ± 1 <sup>f</sup>    | 36 ± 1 <sup>c</sup>   | 41 ± 3 <sup>de</sup> | 58 ± 2 <sup>i</sup>   | 66 ± 2 <sup>j</sup>    | 44 ± 1 <sup>ef</sup>  | 57 ± 0 <sup>hi</sup>   | 50 ± 1 <sup>g</sup>    | 54 ± 0 <sup>h</sup>    |
| (all-E)-lycopene                           | 19 ± 0 <sup>a</sup>                               | 65 ± 0 <sup>e</sup>   | 28 ± 0 <sup>b</sup> | 54 ± 1 <sup>c</sup>   | 70 ± 1 <sup>f</sup>   | 79 ± 1 <sup>hi</sup>  | 74 ± 2 <sup>g</sup>   | 70 ± 1 <sup>f</sup>   | 72 ± 1 <sup>fg</sup>   | 61 ± 1 <sup>d</sup>   | 60 ± 0 <sup>d</sup>  | 59 ± 1 <sup>d</sup>   | 78 ± 0 <sup>h</sup>    | 81 ± 2 <sup>i</sup>   | 74 ± 1 <sup>g</sup>    | 64 ± 1 <sup>e</sup>    | 67 ± 1 <sup>e</sup>    |
| Total hydrocarbon carotenoids              | 15 ± 0 <sup>a</sup>                               | 50 ± 0 <sup>e</sup>   | 23 ± 0 <sup>b</sup> | 41 ± 1 <sup>c</sup>   | 53 ± 0 <sup>fg</sup>  | 60 ± 0 <sup>k</sup>   | 56 ± 1 <sup>hi</sup>  | 51 ± 1 <sup>ef</sup>  | 53 ± 0 <sup>fg</sup>   | 45 ± 1 <sup>d</sup>   | 45 ± 0 <sup>d</sup>  | 46 ± 1 <sup>d</sup>   | 59 ± 0 <sup>jk</sup>   | 58 ± 1 <sup>ij</sup>  | 54 ± 1 <sup>gh</sup>   | 50 ± 0 <sup>e</sup>    | 52 ± 1 <sup>f</sup>    |
| Total xanthophyll esters                   | 13 ± 0 <sup>a</sup>                               | 48 ± 0 <sup>j</sup>   | 28 ± 0 <sup>b</sup> | 36 ± 1 <sup>c</sup>   | 54 ± 0 <sup>l</sup>   | 42 ± 1 <sup>f</sup>   | 44 ± 0 <sup>h</sup>   | 39 ± 0 <sup>e</sup>   | 37 ± 0 <sup>d</sup>    | 39 ± 1 <sup>e</sup>   | 43 ± 0 <sup>gh</sup> | 43 ± 0 <sup>g</sup>   | 46 ± 0 <sup>i</sup>    | 47 ± 0 <sup>ij</sup>  | 47 ± 0 <sup>ij</sup>   | 56 ± 0 <sup>m</sup>    | 53 ± 0 <sup>k</sup>    |
| Total free xanthophylls                    | 13 ± 0 <sup>a</sup>                               | 47 ± 1 <sup>l</sup>   | 22 ± 0 <sup>b</sup> | 41 ± 0 <sup>ghi</sup> | 45 ± 0 <sup>kl</sup>  | 43 ± 0 <sup>ijk</sup> | 41 ± 0 <sup>fgh</sup> | 38 ± 0 <sup>def</sup> | 40 ± 1 <sup>efgh</sup> | 37 ± 2 <sup>de</sup>  | 33 ± 1 <sup>c</sup>  | 42 ± 0 <sup>hij</sup> | 39 ± 0 <sup>defg</sup> | 36 ± 1 <sup>d</sup>   | 45 ± 0 <sup>ijkl</sup> | 45 ± 1 <sup>ijkl</sup> | 40 ± 2 <sup>efgh</sup> |
| Total xanthophylls (free + esters)         | 13 ± 0 <sup>a</sup>                               | 48 ± 0 <sup>l</sup>   | 27 ± 0 <sup>b</sup> | 36 ± 0 <sup>c</sup>   | 53 ± 0 <sup>k</sup>   | 42 ± 1 <sup>f</sup>   | 43 ± 0 <sup>g</sup>   | 39 ± 0 <sup>e</sup>   | 38 ± 0 <sup>d</sup>    | 38 ± 1 <sup>de</sup>  | 42 ± 0 <sup>f</sup>  | 43 ± 0 <sup>fg</sup>  | 45 ± 0 <sup>h</sup>    | 46 ± 0 <sup>h</sup>   | 47 ± 0 <sup>i</sup>    | 55 ± 0 <sup>l</sup>    | 51 ± 1 <sup>j</sup>    |
| Total carotenoids                          | 14 ± 0 <sup>a</sup>                               | 48 ± 0 <sup>h</sup>   | 26 ± 0 <sup>b</sup> | 38 ± 0 <sup>c</sup>   | 53 ± 0 <sup>j</sup>   | 47 ± 0 <sup>g</sup>   | 47 ± 0 <sup>g</sup>   | 43 ± 0 <sup>ef</sup>  | 42 ± 0 <sup>e</sup>    | 40 ± 1 <sup>d</sup>   | 43 ± 0 <sup>ef</sup> | 44 ± 0 <sup>f</sup>   | 49 ± 0 <sup>h</sup>    | 49 ± 1 <sup>h</sup>   | 49 ± 0 <sup>h</sup>    | 53 ± 0 <sup>j</sup>    | 51 ± 1 <sup>i</sup>    |
| RAE                                        | 8 ± 0 <sup>a</sup>                                | 30 ± 0 <sup>hi</sup>  | 14 ± 0 <sup>b</sup> | 25 ± 0 <sup>d</sup>   | 31 ± 0 <sup>i</sup>   | 28 ± 0 <sup>g</sup>   | 26 ± 0 <sup>ef</sup>  | 23 ± 0 <sup>c</sup>   | 25 ± 0 <sup>de</sup>   | 24 ± 1 <sup>c</sup>   | 24 ± 0 <sup>c</sup>  | 26 ± 0 <sup>ef</sup>  | 27 ± 0 <sup>f</sup>    | 26 ± 0 <sup>ef</sup>  | 28 ± 0 <sup>g</sup>    | 29 ± 0 <sup>gh</sup>   | 29 ± 1 <sup>gh</sup>   |

<sup>1</sup> Carotenoid quantification is accomplished by HPLC-DAD-MS/MS. The numbers correspond to run number listed in the Table 2. Letter “C” refers to control. All results are specified as the mean of two independent determinations ± standard deviation. Results with different alphabets in the same row are significantly different (p < 0.05) from each other. Retinol activity equivalents (RAE) are calculated (μg carotenoids/100 g fresh weight) according to guidelines of the United States (US) Institute of Medicine [41].

**Table S4.** Carotenoid extraction yields<sup>1</sup> obtained from papaya (*Carica papaya* L. cv. Sweet Mary) peel tissue applying UAE using sunflower oil and ethanol as green extraction solvent..

| Compound                                   | Extraction yield in peel sunflower oil extracts (%) |                          |                          |                          |                           |                          |                           |                           |                          |                           |                           |                          |                           |                          |                          |                          |                          |
|--------------------------------------------|-----------------------------------------------------|--------------------------|--------------------------|--------------------------|---------------------------|--------------------------|---------------------------|---------------------------|--------------------------|---------------------------|---------------------------|--------------------------|---------------------------|--------------------------|--------------------------|--------------------------|--------------------------|
|                                            | C                                                   | 1                        | 2                        | 3                        | 4                         | 5                        | 6                         | 7                         | 8                        | 9                         | 10                        | 11                       | 12                        | 13                       | 14                       | 15                       | 16                       |
| (9Z)- $\alpha$ -cryptoxanthin              | 0 $\pm$ 0 <sup>a</sup>                              | 44 $\pm$ 1 <sup>f</sup>  | 26 $\pm$ 1 <sup>b</sup>  | 0 $\pm$ 0 <sup>a</sup>   | 42 $\pm$ 1 <sup>e</sup>   | 63 $\pm$ 1 <sup>h</sup>  | 31 $\pm$ 1 <sup>c</sup>   | 58 $\pm$ 1 <sup>g</sup>   | 67 $\pm$ 1 <sup>i</sup>  | 0 $\pm$ 0 <sup>a</sup>    | 0 $\pm$ 0 <sup>a</sup>    | 0 $\pm$ 0 <sup>a</sup>   | 0 $\pm$ 0 <sup>a</sup>    | 0 $\pm$ 0 <sup>a</sup>   | 57 $\pm$ 2 <sup>g</sup>  | 58 $\pm$ 1 <sup>g</sup>  | 35 $\pm$ 1 <sup>d</sup>  |
| (all-E)- $\alpha$ -cryptoxanthin           | 0 $\pm$ 0 <sup>a</sup>                              | 14 $\pm$ 0 <sup>d</sup>  | 17 $\pm$ 0 <sup>e</sup>  | 0 $\pm$ 0 <sup>a</sup>   | 12 $\pm$ 1 <sup>c</sup>   | 19 $\pm$ 0 <sup>g</sup>  | 11 $\pm$ 0 <sup>b</sup>   | 19 $\pm$ 0 <sup>g</sup>   | 18 $\pm$ 0 <sup>ef</sup> | 0 $\pm$ 0 <sup>a</sup>    | 0 $\pm$ 0 <sup>a</sup>    | 0 $\pm$ 0 <sup>a</sup>   | 0 $\pm$ 0 <sup>a</sup>    | 0 $\pm$ 0 <sup>a</sup>   | 25 $\pm$ 0 <sup>i</sup>  | 21 $\pm$ 0 <sup>h</sup>  | 19 $\pm$ 1 <sup>fg</sup> |
| (all-E)- $\beta$ -cryptoxanthin            | 13 $\pm$ 0 <sup>b</sup>                             | 47 $\pm$ 0 <sup>j</sup>  | 19 $\pm$ 0 <sup>d</sup>  | 29 $\pm$ 0 <sup>f</sup>  | 17 $\pm$ 0 <sup>cd</sup>  | 40 $\pm$ 0 <sup>i</sup>  | 39 $\pm$ 0 <sup>i</sup>   | 32 $\pm$ 0 <sup>g</sup>   | 34 $\pm$ 0 <sup>h</sup>  | 11 $\pm$ 0 <sup>a</sup>   | 19 $\pm$ 0 <sup>d</sup>   | 16 $\pm$ 1 <sup>c</sup>  | 17 $\pm$ 1 <sup>cd</sup>  | 29 $\pm$ 2 <sup>ef</sup> | 45 $\pm$ 1 <sup>j</sup>  | 27 $\pm$ 0 <sup>e</sup>  | 17 $\pm$ 1 <sup>cd</sup> |
| (9Z)-violaxanthin laurate                  | 10 $\pm$ 0 <sup>b</sup>                             | 0 $\pm$ 0 <sup>a</sup>    | 0 $\pm$ 0 <sup>a</sup>   | 0 $\pm$ 0 <sup>a</sup>    | 0 $\pm$ 0 <sup>a</sup>    | 0 $\pm$ 0 <sup>a</sup>   | 0 $\pm$ 0 <sup>a</sup>    | 16 $\pm$ 0 <sup>c</sup>   | 0 $\pm$ 0 <sup>a</sup>   | 22 $\pm$ 1 <sup>d</sup>   | 62 $\pm$ 1 <sup>g</sup>  | 45 $\pm$ 2 <sup>f</sup>  | 32 $\pm$ 0 <sup>e</sup>  | 0 $\pm$ 0 <sup>a</sup>   |
| (all-E)-lutein-3-O-myristate               | 9 $\pm$ 0 <sup>b</sup>                              | 0 $\pm$ 0 <sup>a</sup>    | 0 $\pm$ 0 <sup>a</sup>   | 0 $\pm$ 0 <sup>a</sup>    | 0 $\pm$ 0 <sup>a</sup>    | 0 $\pm$ 0 <sup>a</sup>   | 0 $\pm$ 0 <sup>a</sup>    | 36 $\pm$ 1 <sup>d</sup>   | 0 $\pm$ 0 <sup>a</sup>   | 23 $\pm$ 1 <sup>c</sup>   | 57 $\pm$ 1 <sup>e</sup>  | 34 $\pm$ 2 <sup>d</sup>  | 23 $\pm$ 1 <sup>c</sup>  | 0 $\pm$ 0 <sup>a</sup>   |
| (all-E)- $\beta$ -carotene                 | 7 $\pm$ 0 <sup>b</sup>                              | 21 $\pm$ 0 <sup>i</sup>  | 7 $\pm$ 0 <sup>b</sup>   | 14 $\pm$ 0 <sup>d</sup>  | 3 $\pm$ 0 <sup>a</sup>    | 20 $\pm$ 0 <sup>h</sup>  | 18 $\pm$ 0 <sup>g</sup>   | 15 $\pm$ 1 <sup>de</sup>  | 16 $\pm$ 1 <sup>ef</sup> | 7 $\pm$ 0 <sup>b</sup>    | 11 $\pm$ 0 <sup>c</sup>   | 10 $\pm$ 0 <sup>c</sup>  | 17 $\pm$ 0 <sup>fg</sup>  | 25 $\pm$ 0 <sup>k</sup>  | 23 $\pm$ 0 <sup>j</sup>  | 14 $\pm$ 0 <sup>d</sup>  | 6 $\pm$ 0 <sup>b</sup>   |
| (all-E)-antheraxanthin myristate palmitate | 6 $\pm$ 0 <sup>a</sup>                              | 20 $\pm$ 2 <sup>b</sup>  | 26 $\pm$ 2 <sup>c</sup>  | 28 $\pm$ 2 <sup>cd</sup> | 28 $\pm$ 1 <sup>cd</sup>  | 45 $\pm$ 0 <sup>g</sup>  | 41 $\pm$ 2 <sup>fg</sup>  | 38 $\pm$ 1 <sup>ef</sup>  | 33 $\pm$ 2 <sup>de</sup> | 17 $\pm$ 1 <sup>b</sup>   | 44 $\pm$ 2 <sup>g</sup>   | 27 $\pm$ 1 <sup>c</sup>  | 42 $\pm$ 2 <sup>fg</sup>  | 45 $\pm$ 3 <sup>g</sup>  | 20 $\pm$ 0 <sup>b</sup>  | 55 $\pm$ 1 <sup>h</sup>  | 29 $\pm$ 1 <sup>cd</sup> |
| (all-E)-violaxanthin palmitate             | 4 $\pm$ 0 <sup>b</sup>                              | 13 $\pm$ 0 <sup>ef</sup> | 4 $\pm$ 0 <sup>b</sup>   | 9 $\pm$ 0 <sup>c</sup>   | 5 $\pm$ 0 <sup>b</sup>    | 15 $\pm$ 1 <sup>f</sup>  | 10 $\pm$ 0 <sup>d</sup>   | 15 $\pm$ 1 <sup>f</sup>   | 12 $\pm$ 0 <sup>e</sup>  | 4 $\pm$ 0 <sup>b</sup>    | 0 $\pm$ 0 <sup>a</sup>    | 4 $\pm$ 0 <sup>b</sup>   | 3 $\pm$ 0 <sup>b</sup>    | 27 $\pm$ 1 <sup>h</sup>  | 19 $\pm$ 0 <sup>g</sup>  | 12 $\pm$ 0 <sup>de</sup> | 0 $\pm$ 0 <sup>a</sup>   |
| (9Z)-neoxanthin dibutyrate                 | 11 $\pm$ 0 <sup>d</sup>                             | 29 $\pm$ 1 <sup>h</sup>  | 8 $\pm$ 0 <sup>c</sup>   | 20 $\pm$ 0 <sup>ef</sup> | 10 $\pm$ 0 <sup>cd</sup>  | 32 $\pm$ 1 <sup>i</sup>  | 27 $\pm$ 1 <sup>gh</sup>  | 27 $\pm$ 0 <sup>gh</sup>  | 22 $\pm$ 1 <sup>f</sup>  | 10 $\pm$ 0 <sup>cd</sup>  | 0 $\pm$ 1 <sup>a</sup>    | 8 $\pm$ 0 <sup>c</sup>   | 5 $\pm$ 0 <sup>b</sup>    | 88 $\pm$ 1 <sup>j</sup>  | 18 $\pm$ 0 <sup>e</sup>  | 25 $\pm$ 2 <sup>g</sup>  | 0 $\pm$ 0 <sup>a</sup>   |
| (all-E)- $\beta$ -cryptoxanthin caprate    | 12 $\pm$ 0 <sup>a</sup>                             | 36 $\pm$ 0 <sup>k</sup>  | 20 $\pm$ 0 <sup>ef</sup> | 24 $\pm$ 1 <sup>g</sup>  | 19 $\pm$ 1 <sup>def</sup> | 41 $\pm$ 1 <sup>l</sup>  | 34 $\pm$ 1 <sup>jk</sup>  | 36 $\pm$ 0 <sup>k</sup>   | 30 $\pm$ 1 <sup>h</sup>  | 14 $\pm$ 0 <sup>b</sup>   | 20 $\pm$ 0 <sup>f</sup>   | 17 $\pm$ 1 <sup>cd</sup> | 18 $\pm$ 0 <sup>cde</sup> | 33 $\pm$ 2 <sup>ij</sup> | 44 $\pm$ 1 <sup>m</sup>  | 32 $\pm$ 0 <sup>hi</sup> | 16 $\pm$ 0 <sup>bc</sup> |
| (all-E)-lutein dimyristate                 | 14 $\pm$ 1 <sup>a</sup>                             | 40 $\pm$ 2 <sup>g</sup>  | 24 $\pm$ 0 <sup>c</sup>  | 28 $\pm$ 1 <sup>d</sup>  | 47 $\pm$ 0 <sup>h</sup>   | 44 $\pm$ 1 <sup>h</sup>  | 34 $\pm$ 2 <sup>ef</sup>  | 37 $\pm$ 0 <sup>fg</sup>  | 33 $\pm$ 2 <sup>e</sup>  | 19 $\pm$ 1 <sup>b</sup>   | 52 $\pm$ 0 <sup>i</sup>   | 39 $\pm$ 1 <sup>g</sup>  | 66 $\pm$ 2 <sup>j</sup>   | 80 $\pm$ 1 <sup>k</sup>  | 53 $\pm$ 1 <sup>i</sup>  | 45 $\pm$ 0 <sup>h</sup>  | 33 $\pm$ 1 <sup>e</sup>  |
| (all-E)- $\beta$ -cryptoxanthin laurate    | 24 $\pm$ 0 <sup>a</sup>                             | 76 $\pm$ 1 <sup>j</sup>  | 35 $\pm$ 1 <sup>c</sup>  | 55 $\pm$ 0 <sup>f</sup>  | 33 $\pm$ 0 <sup>c</sup>   | 70 $\pm$ 1 <sup>i</sup>  | 51 $\pm$ 0 <sup>e</sup>   | 57 $\pm$ 0 <sup>g</sup>   | 56 $\pm$ 1 <sup>fg</sup> | 29 $\pm$ 0 <sup>b</sup>   | 36 $\pm$ 1 <sup>d</sup>   | 35 $\pm$ 0 <sup>cd</sup> | 37 $\pm$ 1 <sup>d</sup>   | 66 $\pm$ 0 <sup>h</sup>  | 83 $\pm$ 0 <sup>k</sup>  | 50 $\pm$ 1 <sup>e</sup>  | 33 $\pm$ 0 <sup>c</sup>  |
| (all-E)-antheraxanthin laurate myristate   | 5 $\pm$ 0 <sup>a</sup>                              | 15 $\pm$ 1 <sup>c</sup>  | 23 $\pm$ 1 <sup>e</sup>  | 11 $\pm$ 0 <sup>b</sup>  | 73 $\pm$ 0 <sup>k</sup>   | 19 $\pm$ 0 <sup>d</sup>  | 15 $\pm$ 0 <sup>c</sup>   | 16 $\pm$ 0 <sup>c</sup>   | 15 $\pm$ 1 <sup>c</sup>  | 12 $\pm$ 0 <sup>b</sup>   | 66 $\pm$ 2 <sup>j</sup>   | 28 $\pm$ 0 <sup>f</sup>  | 17 $\pm$ 1 <sup>l</sup>   | 42 $\pm$ 1 <sup>g</sup>  | 24 $\pm$ 0 <sup>e</sup>  | 45 $\pm$ 1 <sup>h</sup>  | 51 $\pm$ 1 <sup>i</sup>  |
| (all-E)- $\beta$ -cryptoxanthin myristate  | 8 $\pm$ 0 <sup>a</sup>                              | 26 $\pm$ 0 <sup>ef</sup> | 12 $\pm$ 1 <sup>b</sup>  | 16 $\pm$ <sup>cd</sup>   | 14 $\pm$ 0 <sup>c</sup>   | 26 $\pm$ 1 <sup>ef</sup> | 17 $\pm$ 1 <sup>cd</sup>  | 19 $\pm$ 1 <sup>d</sup>   | 19 $\pm$ 1 <sup>d</sup>  | 16 $\pm$ 1 <sup>cd</sup>  | 24 $\pm$ 2 <sup>e</sup>   | 17 $\pm$ 0 <sup>cd</sup> | 28 $\pm$ 1 <sup>f</sup>   | 37 $\pm$ 1 <sup>h</sup>  | 32 $\pm$ 0 <sup>g</sup>  | 18 $\pm$ 0 <sup>d</sup>  | 16 $\pm$ 0 <sup>cd</sup> |
| (13Z)-lycopene isomer 2                    | 0 $\pm$ 0 <sup>a</sup>                              | 53 $\pm$ 1 <sup>gh</sup> | 30 $\pm$ 1 <sup>cd</sup> | 39 $\pm$ 0 <sup>e</sup>  | 61 $\pm$ 2 <sup>hi</sup>  | 43 $\pm$ 2 <sup>ef</sup> | 42 $\pm$ 2 <sup>ef</sup>  | 49 $\pm$ 3 <sup>fg</sup>  | 51 $\pm$ 2 <sup>fg</sup> | 45 $\pm$ 0 <sup>efg</sup> | 37 $\pm$ 0 <sup>de</sup>  | 20 $\pm$ 0 <sup>b</sup>  | 26 $\pm$ 3 <sup>bc</sup>  | 26 $\pm$ 1 <sup>bc</sup> | 67 $\pm$ 4 <sup>i</sup>  | 41 $\pm$ 1 <sup>k</sup>  | 75 $\pm$ 0 <sup>j</sup>  |
| (9Z)-lycopene isomer 4                     | 0 $\pm$ 0 <sup>a</sup>                              | 43 $\pm$ 3 <sup>e</sup>  | 16 $\pm$ 1 <sup>b</sup>  | 0 $\pm$ 0 <sup>a</sup>   | 55 $\pm$ 1 <sup>h</sup>   | 44 $\pm$ 1 <sup>ef</sup> | 51 $\pm$ 2 <sup>fgh</sup> | 45 $\pm$ 3 <sup>efg</sup> | 31 $\pm$ 1 <sup>cd</sup> | 25 $\pm$ 1 <sup>c</sup>   | 47 $\pm$ 0 <sup>efg</sup> | 35 $\pm$ 1 <sup>d</sup>  | 25 $\pm$ 2 <sup>c</sup>   | 31 $\pm$ 2 <sup>cd</sup> | 52 $\pm$ 4 <sup>gh</sup> | 29 $\pm$ 0 <sup>j</sup>  | 77 $\pm$ 1 <sup>i</sup>  |
| (all-E)-lycopene                           | 20 $\pm$ 0 <sup>a</sup>                             | 68 $\pm$ 0 <sup>i</sup>  | 25 $\pm$ 1 <sup>b</sup>  | 46 $\pm$ 0 <sup>e</sup>  | 71 $\pm$ 1 <sup>i</sup>   | 68 $\pm$ 0 <sup>i</sup>  | 53 $\pm$ 2 <sup>h</sup>   | 50 $\pm$ 2 <sup>fg</sup>  | 47 $\pm$ 0 <sup>ef</sup> | 18 $\pm$ 0 <sup>a</sup>   | 28 $\pm$ 1 <sup>c</sup>   | 23 $\pm$ 0 <sup>b</sup>  | 18 $\pm$ 0 <sup>a</sup>   | 51 $\pm$ 2 <sup>gh</sup> | 82 $\pm$ 0 <sup>k</sup>  | 36 $\pm$ 1 <sup>d</sup>  | 75 $\pm$ 1 <sup>j</sup>  |
| Total hydrocarbon carotenoids              | 15 $\pm$ 0 <sup>a</sup>                             | 51 $\pm$ 0 <sup>hi</sup> | 18 $\pm$ 0 <sup>b</sup>  | 33 $\pm$ 0 <sup>d</sup>  | 47 $\pm$ 1 <sup>g</sup>   | 50 $\pm$ 0 <sup>h</sup>  | 41 $\pm$ 1 <sup>f</sup>   | 38 $\pm$ 1 <sup>e</sup>   | 36 $\pm$ 0 <sup>e</sup>  | 16 $\pm$ 0 <sup>a</sup>   | 24 $\pm$ 1 <sup>c</sup>   | 20 $\pm$ 0 <sup>b</sup>  | 19 $\pm$ 0 <sup>b</sup>   | 40 $\pm$ 2 <sup>f</sup>  | 60 $\pm$ 0 <sup>j</sup>  | 28 $\pm$ 1 <sup>e</sup>  | 53 $\pm$ 0 <sup>i</sup>  |
| Total xanthophyll esters                   | 12 $\pm$ 0 <sup>a</sup>                             | 30 $\pm$ 0 <sup>i</sup>  | 17 $\pm$ 0 <sup>c</sup>  | 22 $\pm$ 0 <sup>e</sup>  | 24 $\pm$ 0 <sup>f</sup>   | 32 $\pm$ 1 <sup>j</sup>  | 25 $\pm$ 0 <sup>g</sup>   | 27 $\pm$ 0 <sup>h</sup>   | 25 $\pm$ 0 <sup>g</sup>  | 14 $\pm$ 0 <sup>b</sup>   | 33 $\pm$ 0 <sup>k</sup>   | 19 $\pm$ 0 <sup>d</sup>  | 37 $\pm$ 0 <sup>m</sup>   | 53 $\pm$ 0 <sup>o</sup>  | 43 $\pm$ 0 <sup>n</sup>  | 35 $\pm$ 0 <sup>l</sup>  | 20 $\pm$ 0 <sup>d</sup>  |
| Total free xanthophylls                    | 13 $\pm$ 0 <sup>c</sup>                             | 40 $\pm$ 1 <sup>j</sup>  | 19 $\pm$ 0 <sup>d</sup>  | 21 $\pm$ 0 <sup>e</sup>  | 18 $\pm$ 0 <sup>d</sup>   | 38 $\pm$ 0 <sup>i</sup>  | 33 $\pm$ 0 <sup>gh</sup>  | 31 $\pm$ 0 <sup>g</sup>   | 33 $\pm$ 0 <sup>h</sup>  | 8 $\pm$ 0 <sup>a</sup>    | 14 $\pm$ 0 <sup>c</sup>   | 11 $\pm$ 0 <sup>b</sup>  | 13 $\pm$ 1 <sup>bc</sup>  | 21 $\pm$ 1 <sup>e</sup>  | 42 $\pm$ 0 <sup>k</sup>  | 28 $\pm$ 0 <sup>f</sup>  | 19 $\pm$ 0 <sup>d</sup>  |
| Total xanthophylls (free + esters)         | 12 $\pm$ 0 <sup>a</sup>                             | 31 $\pm$ 0 <sup>j</sup>  | 17 $\pm$ 0 <sup>c</sup>  | 22 $\pm$ 0 <sup>f</sup>  | 23 $\pm$ 0 <sup>g</sup>   | 33 $\pm$ 0 <sup>k</sup>  | 26 $\pm$ 0 <sup>h</sup>   | 28 $\pm$ 0 <sup>i</sup>   | 26 $\pm$ 0 <sup>h</sup>  | 13 $\pm$ 0 <sup>b</sup>   | 31 $\pm$ 0 <sup>j</sup>   | 18 $\pm$ 0 <sup>d</sup>  | 33 $\pm$ 0 <sup>k</sup>   | 49 $\pm$ 1 <sup>n</sup>  | 43 $\pm$ 0 <sup>m</sup>  | 35 $\pm$ 0 <sup>l</sup>  | 20 $\pm$ 0 <sup>e</sup>  |
| Total carotenoids                          | 13 $\pm$ 0 <sup>a</sup>                             | 37 $\pm$ 0 <sup>h</sup>  | 18 $\pm$ 0 <sup>b</sup>  | 25 $\pm$ 0 <sup>d</sup>  | 30 $\pm$ 0 <sup>f</sup>   | 38 $\pm$ 0 <sup>h</sup>  | 30 $\pm$ 0 <sup>f</sup>   | 30 $\pm$ 1 <sup>f</sup>   | 29 $\pm$ 0 <sup>e</sup>  | 14 $\pm$ 0 <sup>a</sup>   | 29 $\pm$ 0 <sup>e</sup>   | 19 $\pm$ 0 <sup>c</sup>  | 29 $\pm$ 0 <sup>ef</sup>  | 47 $\pm$ 1 <sup>i</sup>  | 48 $\pm$ 0 <sup>j</sup>  | 33 $\pm$ 0 <sup>g</sup>  | 29 $\pm$ 0 <sup>ef</sup> |
| RAE                                        | 8 $\pm$ 0 <sup>a</sup>                              | 27 $\pm$ 0 <sup>j</sup>  | 12 $\pm$ 0 <sup>c</sup>  | 18 $\pm$ 0 <sup>g</sup>  | 11 $\pm$ 0 <sup>bc</sup>  | 26 $\pm$ 0 <sup>i</sup>  | 21 $\pm$ 0 <sup>h</sup>   | 20 $\pm$ 0 <sup>h</sup>   | 20 $\pm$ 0 <sup>h</sup>  | 11 $\pm$ 0 <sup>b</sup>   | 15 $\pm$ 1 <sup>e</sup>   | 13 $\pm$ 0 <sup>d</sup>  | 17 $\pm$ 0 <sup>f</sup>   | 27 $\pm$ 0 <sup>j</sup>  | 30 $\pm$ 0 <sup>k</sup>  | 18 $\pm$ 0 <sup>g</sup>  | 12 $\pm$ 0 <sup>c</sup>  |

<sup>1</sup> Carotenoid quantification is accomplished by HPLC-DAD-MS/MS. The numbers correspond to run number listed in the Table 2. Letter “C” refers to control. All results are specified as the mean of two independent determinations  $\pm$  standard deviation. Results with different alphabets in the same row are significantly different (p < 0.05) from each other. Retinol activity equivalents (RAE) are calculated ( $\mu$ g carotenoids/100 g fresh weight) according to guidelines of the United States (US) Institute of Medicine [41].

**Table S5.** Physical and physical-chemical characteristics of papaya (*Carica papaya* L. cv. Sweet Mary).

| Characteristic                                         | Value <sup>1</sup> |
|--------------------------------------------------------|--------------------|
| Total weight of whole fruit (g)                        | 1128.9 ± 165.6     |
| Apical calibre (cm)                                    | 20.9 ± 0.6         |
| Equatorial calibre (cm)                                | 9.5 ± 0.2          |
| Titrateable acidity (g citric acid/100 g fresh weight) | 0.12 ± 0.00        |
| pH                                                     | 5.2 ± 0.1          |
| Soluble solids (°Brix at 25 °C)                        | 10.2 ± 0.3         |
| Moisture content (% wet basis)                         | 84.9 ± 1.7         |
| Pulp color parameters                                  |                    |
| L*                                                     | 62.4 ± 10.0        |
| a*                                                     | 22.4 ± 7.1         |
| b*                                                     | 26.8 ± 5.1         |
| Peel color parameters                                  |                    |
| L*                                                     | 52.6 ± 5.4         |
| a*                                                     | 13.0 ± 1.2         |
| b*                                                     | 21.4 ± 5.1         |

<sup>1</sup> Values are the mean of three independent determinations ±standard deviation.
